1 **Impact of a nutrition-sensitive agroecology program in Andhra Pradesh,**  
2 **India, on dietary diversity, nutritional status, and child development**

3

4 Short title: Impacts of nutri-gardens

5 Authors: Lakshmi Durga<sup>1</sup>, Yandrapu Bharath<sup>2</sup>, Lilia Bliznashka<sup>3,4\*</sup>, Vijay Kumar<sup>1</sup>, Veerendra  
6 Jonnala<sup>1</sup>, Vijayalakshmi Chekka<sup>1</sup>, Srileka Yebushi<sup>1</sup>, Aditi Roy<sup>2</sup>, Nikhil Srinivasapura  
7 Venkateshmurthy<sup>2,5</sup>, Poornima Prabhakaran<sup>2</sup>, Lindsay M. Jaacks<sup>3,6</sup>

8 <sup>1</sup>Rythu Sadhikara Samstha, Guntur, Andhra Pradesh, India

9 <sup>2</sup>Public Health Foundation of India, New Delhi, India

10 <sup>3</sup>Global Academy of Agriculture and Food Systems, The University of Edinburgh, Midlothian,  
11 UK

12 <sup>4</sup>International Food Policy Research Institute, Washington DC, USA

13 <sup>5</sup>Centre for Chronic Disease Control, New Delhi, India

14 <sup>6</sup>Harvard TH Chan School of Public Health, Boston, Massachusetts, USA

15

16 \* Corresponding author:

17 Email: [l.bliznashka@cgiar.org](mailto:l.bliznashka@cgiar.org) (LB)

18

19 **Conflicts of Interest:** LD, VK, VJ, VC and SY were affiliates of the government organization  
20 responsible for implementing the program evaluated in this study.

21 **Acknowledgements:** We would like to thank the Nutrition Farming Fellows who collected the  
22 data for this evaluation, and the participants for kindly volunteering their time for assessments.

23 We would also like to thank Govinda Raju for preparing the map of participating villages.

**NOTE:** This preprint reports new research that has not been certified by peer review and should not be used to guide clinical practice.

24 **Funding:** YB, LB, NSV, PP and LMJ were supported by the Medical Research Council/UK  
25 Research and Innovation (grant number MR/T044527/1). AR was supported by a  
26 DBT/Wellcome Trust India Alliance Fellowship (grant number IA/CPHE/20/1/505272). For  
27 the purpose of open access, the author has applied a Creative Commons Attribution (CC BY)  
28 licence to any Author Accepted Manuscript version arising from this submission.  
29

## 30 **Abstract**

31 **Introduction:** To date, most food-based nutrition interventions have not considered food  
32 production practices, particularly the use of synthetic chemicals. This study aimed to evaluate  
33 the impact of a multi-component food-based nutrition intervention involving homestead food  
34 production, nutrition counselling, cooking demonstrations, and crop planning exercises, and  
35 employing agroecological production practices (herein ‘nutrition-sensitive agroecology  
36 program’), on dietary diversity, nutritional status, and child development in Andhra Pradesh,  
37 India.

38  
39 **Methods:** A cross-sectional assessment was conducted in 2021-2022 of 50 intervention  
40 villages where the nutrition-sensitive agroecology program had been implemented since 2018  
41 and 79 control villages where only the agroecology program had been implemented. Data on  
42 self-reported dietary intake, caregiver-reported early child development, anthropometric  
43 measurements, and hemoglobin concentrations were collected using standardized procedures  
44 by trained Nutrition Farming Fellows, who were also responsible for implementing the  
45 program.

46  
47 **Results:** A sample of 3,511 households (1,121 intervention and 2,390 control) participated in  
48 the survey. Dietary diversity scores (DDS) among women and men were mean (SD) 6.53  
49 ( $\pm 1.62$ ) and 6.16 ( $\pm 1.65$ ), respectively, in intervention villages and 5.81 ( $\pm 1.58$ ) and 5.39  
50 ( $\pm 1.61$ ), respectively, in control villages ( $p < 0.01$ ). DDS among children 6-24 months of age in  
51 intervention and control villages was 2.99 ( $\pm 1.52$ ) and 2.73 ( $\pm 1.62$ ), respectively ( $p < 0.01$ ).  
52 Children  $< 2$  years of age were less likely to be anemic in intervention versus control villages  
53 (59% versus 69%,  $p < 0.01$ ). Children 18-35 months age in intervention villages had higher child  
54 development scores than children in control villages (all  $p < 0.05$ ).

55

56 **Conclusion:** Nutrition-sensitive agroecological programs may be effective in improving diets,  
57 nutrition, and child development in rural India.

58

59 **Key words:** Nutrition-sensitive agriculture, maternal and child health, sustainable  
60 consumption, agroecology, home gardens, diet quality, child development

## 61 **Introduction**

62 India, which is home to one-sixth of the global population, ranks 107th on the Global  
63 Hunger Index and suffers from a high burden of undernutrition (1) despite economic  
64 development (2). According to the latest National Family Health Survey (NFHS, 2019-21),  
65 35.5% of children <5 years of age are stunted, 19.3% are wasted, and 57.0% of reproductive-  
66 aged women are anemic (3). These numbers reflect only small improvements in stunting and  
67 wasting, and a slight worsening of anemia compared to the previous round of NFHS, conducted  
68 in 2015-16, which found child stunting, wasting, and women's anemia were 38.4%, 21.0%,  
69 and 55.3%, respectively (4).

70 Successive governments in India have attempted various interventions aimed at  
71 addressing undernutrition. Most recently, food-based strategies to promote dietary diversity  
72 have been highlighted by the Government of India, including in the Poshan (nutrition) 2.0  
73 guidelines by the Ministry of Women and Child Development (5). To date, the most common  
74 food-based strategy employed has been nutri-gardens, sometimes referred to as kitchen gardens  
75 or homestead gardening. Several evaluations of nutri-gardens have been conducted in India (6–  
76 12). For example, one study in Telangana in south India evaluated a home garden and backyard  
77 poultry intervention coupled with nutrition education and found a significant increase in the  
78 quantity of green leafy vegetables and eggs consumed by women and children (10). Beyond  
79 India, evidence from other South Asian countries and Sub-Saharan Africa shows that nutri-  
80 gardens are an effective nutrition-sensitive agricultural intervention to improve women and  
81 children's diets through the production of nutrient-dense products and dietary diversification  
82 (7,13).

83 Most nutrition-sensitive agricultural interventions to date have not emphasized  
84 agroecological production methods, including limiting the use of synthetic chemicals such as

85 pesticides. However, given increasing evidence of adverse effects of pesticides on child growth  
86 (14) and development (15), the production practices used for nutri-gardens are an important  
87 consideration. Moreover, most evaluations of nutri-garden interventions have focused on the  
88 impact on women and children's dietary diversity, or, in a few cases, on women and children's  
89 nutritional status including anthropometry and anemia (7). Important gaps remain in  
90 understanding the impact of nutrition-sensitive agricultural interventions on under-studied  
91 outcomes including child development, men's dietary diversity, and women's anemia.

92 The objective of this study was to evaluate the impact of a government funded and  
93 implemented nutrition-sensitive agroecology program on adult and child dietary diversity,  
94 nutritional status, and child development. Our study advances the understanding of the  
95 importance of pesticide-free production practices in the context of food-based strategies to  
96 improve nutrition and child development.

## 97 **Methods**

### 98 **Study context**

99 The study was conducted in the south Indian state of Andhra Pradesh, known as the  
100 'rice bowl of India' where 63% of households depend on agriculture and 37% of land area is  
101 under agriculture (including fishponds) (16). The main nutrition problems are child stunting  
102 (31%), child wasting (16%), and women's anemia (59%) (17). Rates of non-communicable  
103 diseases in Andhra Pradesh, particularly diabetes and hypertension, are also on the rise (17).

### 104 **Intervention**

105 This study evaluated a food-based nutrition intervention that was embedded within a  
106 larger government program, called the Andhra Pradesh Community managed Natural Farming  
107 (APCNF), previously referred to as Zero Budget Natural Farming (ZBNF). APCNF is an  
108 ongoing community-based transformation program implemented by Rythu Sadhikara Samstha

109 (RySS), a not-for-profit company established by the Government of Andhra Pradesh. The  
110 program aims to convert all six million farmers and six million hectares of land to natural  
111 farming by the year 2031 (18).

112 The APCNF intervention, conceived as a climate-resilient, agroecological intervention,  
113 comprises use of locally sourced natural inputs to act as bio stimulants to the soil. APCNF is  
114 grounded in nine universal principles: (1) soil to be covered with crops 365 days (living root  
115 principle), (2) diverse crops, 15–20 crops, including trees, (3) keep the soil covered with crop  
116 residues, whenever living plants are not there, (4) minimal disturbance of soils, minimize  
117 tillage, (5) farmers' own seeds or indigenous seeds, (6) integrate animals into farming, (7) bio  
118 stimulants as catalysts to trigger soil biology, (8) pest management through better agronomical  
119 practices and botanical pesticides, and (9) no synthetic fertilizers, pesticides, herbicides, or  
120 weedicides. The intervention is implemented through women collectives known as self-help  
121 groups and their federations (19).

122 The food-based nutrition intervention comprised a variety of initiatives to nudge  
123 households towards better dietary diversity, health seeking behaviors, and nutrition. Specific  
124 initiatives included implementing homestead food production (nutri-gardens, backyard poultry  
125 and small ruminants, and fisheries), nutrition counselling at Farmer Nutrition Schools, cooking  
126 demonstrations, crop planning exercises, and behavior change communication (BBC).  
127 Participatory Learning and Action tools were employed to counsel women attending the  
128 Farmer Nutrition Schools. The cooking demonstrations involved recipe preparation with  
129 locally available ingredients and cooking methods for retention of nutrients.

130 The target beneficiaries consisted of pregnant and lactating women, mothers of children  
131 under 2 years of age, adolescent girls, and women from the 'poorest of the poor' households.  
132 The 'poorest of the poor' households included agricultural labor households that did not own

133 land, nor take land on lease, or belonged to Scheduled Caste / Scheduled Tribe communities  
134 and owned less than two acres of land (19). The Scheduled Caste / Scheduled Tribe  
135 communities are the most marginalized sections of society.

136 These interventions were implemented by Nutrition Farming Fellows (NFFs) trained in  
137 Home Science, whose primary objective was to counsel the target beneficiaries to encourage  
138 nutritious food consumption behaviors. The NFFs resided in their allocated villages, for which  
139 they were paid by RySS. The NFFs worked in synergy with various community programs such  
140 as Integrated Child Development Scheme, that provides an array of services to children below  
141 6 years and their mothers. Beginning at the end of 2018, 50 APCNF villages received this food-  
142 based nutrition intervention (herein ‘intervention villages’). Villages were selected from each  
143 of the state’s 13 districts, as shown in Fig 1 (as of April 2022, there were 26 districts in Andhra  
144 Pradesh).

#### 145 Evaluation Design and Sample

146 A cross-sectional survey was conducted between 20 December 2021 and 11 March  
147 2022. Data were collected on dietary diversity for men, women, and children; nutritional status  
148 (anthropometry and anemia) for women and children, and child development for children under  
149 3 years of age living in the 50 intervention villages and in 79 APCNF villages where the food-  
150 based nutrition intervention had not yet been implemented (herein ‘control villages’). The 79  
151 control villages were villages adjacent to the intervention villages.

152

153 ***Figure 1.*** A map depicting the 50 intervention villages and 79 control villages across  
154 *the 13 districts of Andhra Pradesh (as of April 2022, there were 26 districts).*



## 155 Ethics

156 The Public Health Foundation of India Institutional Ethics Committee (Protocol  
157 number: TRC-IEC 488/22) and the Harvard T.H. Chan School of Public Health Institutional  
158 Review Board (Protocol number: IRB22-0220) approved the study. Written informed consent  
159 was obtained from all adult participants and parents/caregivers of children and adolescents.

## 160 Data Collection

161 Data were collected by the NFFs, who were trained over two days in standardized data  
162 collection procedures and electronic data capture using EpiCollect. The survey questionnaire  
163 was pilot tested for suitability. NFFs collected the data in collaboration with the Department of  
164 Women and Child Development and local childcare centers known as Anganwadi Centers. The  
165 survey collected information on socio-economic and demographic characteristics, nutri-garden  
166 practices, and natural farming practices. LD, VJ, VC and SY had access to participant  
167 identifying information during data collection.

168 Dietary diversity for men, women, and children was assessed over the past 24 hours  
169 based on Food and Agriculture Organization guidelines (20). Women reported their own  
170 intake, and that of their children and spouse. A dietary diversity score (DDS, range 0-10) was  
171 calculated for women, men, and children over 2 years of age. A binary indicator was calculated  
172 for meeting minimum dietary diversity (MDD) if DDS was  $\geq 5$  food groups (20). For children  
173 6-24 months of age, DDS (range 0-8) and MDD (DDS $\geq 5$ ) were calculated according to the  
174 World Health Organization (WHO) Infant and Young Child Feeding (IYCF) indicators (21).  
175 Diet adequacy for breastfed children was calculated as children receiving  $\geq 4$  food groups and  
176 a minimum meal frequency (MMF), defined as receiving solid or semi-solid food  $\geq 2$  times per  
177 day for children 6-8 months of age and  $\geq 3$  times per day for children 9-23 months of age. Diet  
178 adequacy for non-breastfed children was calculated as meeting the following three IYCF

179 practices: (1) being fed with other milk or milk products  $\geq 2$  times per day, (2) meeting MMF,  
180 defined as receiving solid or semi-solid foods  $\geq 1$  per day, and (3) receiving solid or semi-solid  
181 foods from  $\geq 4$  food groups not including the dairy food group (21).

182 Anthropometry for women and children under 2 years of age was measured using  
183 standardized procedures. Weight was measured to the nearest 0.1 gram using a digital or  
184 analogous scale. Height for women was measured to the nearest 0.1 cm using a stadiometer,  
185 and length for children under 2 years of age was measured using a length board. Women's  
186 body mass index (BMI,  $\text{kg}/\text{m}^2$ ) was calculated, and women were categorized as underweight  
187 ( $\text{BMI} < 18.5 \text{ kg}/\text{m}^2$ ), normal weight (BMI between 18.5-24.9  $\text{kg}/\text{m}^2$ ), overweight (BMI between  
188 25-29.9  $\text{kg}/\text{m}^2$ ), or obese ( $\text{BMI} \geq 30 \text{ kg}/\text{m}^2$ ). Length-for-age Z-score (LAZ), weight-for-age Z-  
189 score (WAZ), and weight-for-length Z-score (WLZ) were calculated according to the 2006  
190 WHO Child Growth Standards (22). Stunting was defined as LAZ  $< -2$  SD, underweight as  
191 WAZ  $< -2$  SD, and wasting as WLZ  $< -2$  SD.

192 Hemoglobin (Hb) concentrations for women and children under 2 years of age were  
193 measured using a point-of-care device, *Mission*<sup>®</sup> Hemoglobin system. Among pregnant  
194 women and children under 2 years of age, anemia was defined as severe: Hb  $< 7.0$  g/dL,  
195 moderate: Hb 7-9.9 g/dL, mild: Hb 10-10.9 g/dL, and no anemia Hb  $\geq 11$  g/dL. Among non-  
196 pregnant women, anemia was defined as severe: Hb  $< 8.0$  g/dL, moderate: Hb 8-10.9 g/dL,  
197 mild: Hb 11-11.9 g/dL, and no anemia Hb  $\geq 12$  g/dL (23).

198 The short-form Caregiver Reported Early Development Index (CREDI) tool was used  
199 to assess child's development in children under 3 years of age (24). The CREDI short form  
200 consists of a set of 20 items differing according to the following age bands: 0-5 months, 6-11  
201 months, 12-17 months, 18-23 months, 24-29 months, and 30-35 months. The CREDI was  
202 administered by NFFs to the child's primary caregiver who reported on whether the child can  
203 perform each item (yes/no) (25). Norm-referenced Z-scores for overall development for each

204 age band were calculated from raw scores using the CREDI Scoring Application. A positive  
205 Z-score indicated a child has better developmental status than the average child in the CREDI  
206 reference population in the same age band. A Z-score of zero indicated a child has similar  
207 developmental status to the average child in the CREDI reference population in the same age  
208 band. A negative Z-score indicated a child has worse developmental status than the average  
209 child in the CREDI reference population in the same age band (26).

## 210 Data Analysis

211 The analytic sample size included 3,511 households (1,121 intervention households and  
212 2,390 control households). We calculated mean and SD for continuous variables and  
213 proportions for binary variables. We used t-tests to test whether differences between the control  
214 and the intervention groups were significant. P-value <0.05 was considered statistically  
215 significant. Data analysis was conducted using Stata 17.0.

## 216 Results

217 Sample characteristics are summarized in Table 1. Women were, on average, 25 years  
218 old. Forty-three percent of intervention villages were classified as ‘tribal villages’ versus 23%  
219 of control villages ( $p<0.01$ ). Villages were classified as ‘tribal’ based on standard Government  
220 of India criterion, e.g., more than 25% of the village population belonged to Scheduled Tribe  
221 (27). Thirty-seven percent of the households in intervention villages reported practicing natural  
222 farming compared to 12% in control villages ( $p<0.01$ ). Forty-three percent of households in  
223 intervention villages reported having a nutri-garden compared to 11% of households in control  
224 villages ( $p<0.01$ ). Thirty-nine percent of households in intervention villages reported having  
225 backyard poultry compared to 21% in control villages ( $p<0.01$ ). Of those who had backyard  
226 poultry, 8% of households in intervention villages reported selling and not consuming their

227 backyard poultry produce compared to 18% in control villages – in other words, households in  
 228 control villages were more likely to sell their produce and not consume them than households  
 229 in intervention villages ( $p < 0.01$ ).

**Table 1.** Descriptive characteristics of the 3,511 households enrolled in the evaluation of a nutrition-sensitive agroecology program in Andhra Pradesh, India. Values are Mean  $\pm$  SD or N (%).

|                               | Intervention    | Control         |
|-------------------------------|-----------------|-----------------|
| Mothers                       |                 |                 |
| N                             | 1121            | 2390            |
| Age (years)                   | 24.7 $\pm$ 3.7  | 24.9 $\pm$ 3.8  |
| Education                     |                 |                 |
| Illiterate                    | 50 (4.46)       | 86 (3.6)        |
| Literate, no formal education | 37 (3.3)        | 46 (1.92)       |
| Primary school                | 59 (5.26)       | 128 (5.36)      |
| Middle school                 | 218 (19.45)     | 495 (20.71)     |
| High school                   | 326 (29.08)     | 799 (33.43)     |
| Higher Secondary school       | 249 (22.21)     | 470 (19.67)     |
| Graduate                      | 156 (13.92)     | 319 (13.35)     |
| Children <2 years old         |                 |                 |
| N                             | 888             | 1861            |
| Age (months)                  | 11.8 $\pm$ 6.6  | 11.2 $\pm$ 6.9  |
| Female                        | 431 (48.5)      | 878 (47.1)      |
| Children >2 years old         |                 |                 |
| N                             | 763             | 1400            |
| Age (years)                   | 5.2 $\pm$ 2.8   | 4.8 $\pm$ 2.7   |
| Female                        | 443 (58.1)      | 762 (54.4)      |
| Household Size                | 4.22 $\pm$ 1.22 | 4.14 $\pm$ 1.19 |

230

## 231 Dietary Diversity

232         DDS among women and men was mean (SD) 6.53 ( $\pm$ 1.62) and 6.16 ( $\pm$ 1.65),  
 233 respectively in intervention villages and 5.81 ( $\pm$ 1.58) and 5.39 ( $\pm$ 1.61), respectively in control  
 234 villages (Supplementary Table T1). Adults in intervention villages were more likely to have  
 235 diverse diets compared to adults in control villages: 87% of women and 83% of men in  
 236 intervention villages had a diverse diet (DDS  $\geq$ 5) compared to 79% of women and 73% of men

237 in control villages ( $p < 0.01$  for women and  $p < 0.01$  for men). Compared to women in control  
238 villages, women in intervention villages were significantly more likely to consume all food  
239 groups *except* starchy staples, other vegetables, and flesh foods ( $p < 0.01$ ) (Fig 2, panel A).  
240 Results were similar for men (Fig 2, panel B).

241 Forty-three percent of women and 41% of men in intervention villages reported  
242 consuming any type of naturally farmed foods compared to 22% and 15%, respectively, in  
243 control villages. Overall, consumption of naturally farmed starchy staples, pulses, dark green  
244 leafy vegetables, vitamin A-rich fruits and vegetables, and other fruits and vegetables, was  
245 higher in intervention villages as compared to control villages (Supplementary Fig S1).

246

247 ***Figure 2. Food groups consumed by (A) adult women and (B) adult men in***  
248 *intervention versus control villages as part of an evaluation of a nutrition-sensitive*  
249 *agroecology program in Andhra Pradesh, India.  $P < 0.01$  for all intervention versus control*  
250 *comparisons except starchy staples, other vegetables, and flesh foods.*

251

252 In children 6-24 months of age, 8% of breastfed children in intervention villages had  
253 an adequate diet compared to 11% in control villages ( $p = 0.02$ ). DDS among children 6-24  
254 months of age in intervention and control villages was mean (SD) 2.99 ( $\pm 1.52$ ) and 2.73  
255 ( $\pm 1.62$ ), respectively ( $p < 0.01$ ) (Supplementary Table T2). With regards to specific food groups,  
256 children 6-24 months of age in intervention villages were more likely to consume eggs and  
257 vitamin A-rich fruits and vegetables (Fig 3, panel A). No differences were observed for the  
258 other food groups. There were no differences in DDS by child sex ( $p = 0.12$ ).

259 Among children over 2 years of age (range 2-18 years), DDS was mean (SD) 6.6 ( $\pm 1.7$ )  
260 in intervention villages and 6.0 ( $\pm 1.5$ ) in control villages ( $p < 0.01$ ). In the intervention villages,

261 children over 2 years of age were more likely to consume other fruits, vitamin A-rich fruits and  
262 vegetables, dark leafy vegetables, dairy products, nuts, and eggs (Fig 3, panel B). There were  
263 no differences in DDS by child sex in children over 2 years of age ( $p=0.16$ ).

264

265 *Figure 3. Food groups consumed by (A) children under 2 years old and (B) children*  
266 *over 2 years old in intervention versus control villages as part of an evaluation of a nutrition-*  
267 *sensitive agroecology program in Andhra Pradesh, India.*

## 268 Nutritional Status

269 Women in intervention villages were less likely to be overweight (16% versus 23%,  
270 respectively  $p=0.01$ ) and more likely to be underweight as compared to women in control  
271 villages (12% versus 8%, respectively,  $p=0.02$ ) (Fig 4, panel A). In children under 2 years of  
272 age, stunting prevalence was similar in intervention and control villages ( $p=0.83$ ) (Fig 4, Panel  
273 A). However, children in intervention villages were more likely to be underweight (28% versus  
274 23%, respectively,  $p=0.01$ ) and wasted (26% versus 21%, respectively,  $p<0.01$ ) compared to  
275 children in control villages. Of note, children measured with an analogue scale were twice as  
276 likely to be wasted as children measured with a digital scale (23% versus 11%, respectively,  
277  $p<0.01$ ), whereas women measured with an analogue scale were less likely to be underweight  
278 than those measured with a digital scale (9% versus 17%, respectively,  $p=0.02$ ).

279 Moderate anemia was the most common form of anemia, with half of women in both  
280 intervention and control villages classified as having moderate anemia (Fig 4, panel B). There  
281 were no significant differences in anemia prevalence between women in intervention versus  
282 control villages. In contrast, children under 2 years of age in intervention villages were less  
283 likely to be anemic as compared to control villages: 59% versus 69%, respectively ( $p<0.01$ )  
284 (Fig 4, panel B). When examining the distribution of hemoglobin concentrations, the entire

285 distribution had shifted right in intervention villages, i.e., to higher hemoglobin values among  
286 children (Supplementary Fig S2).

287

288 **Figure 4.** *Nutritional status of women and children under 2 years of age, including*  
289 *(A) anthropometry and (B) anemia in intervention and control villages as part of an*  
290 *evaluation of a nutrition-sensitive agroecology program in Andhra Pradesh, India.*

291

## 292 Child Development

293 Children in intervention villages had better early child development scores as compared  
294 to children in control villages with larger benefits among older age groups (Fig 5). We observed  
295 a shift from negative Z-score to positive Z- scores with increase in child age. Among children  
296 0-5 months of age, children in control villages had better Z-scores than children in intervention  
297 villages: -0.37 versus -0.68, respectively ( $p<0.01$ ). Among children 6-11 months and 12-17  
298 months old, children in intervention villages had consistently higher Z-scores, albeit not  
299 statistically significant (Supplementary Table T3). However, among children 18-23 months of  
300 age, those in intervention villages had significantly higher mean Z-scores compared to children  
301 in control villages (0.46 versus 0.24, respectively,  $p=0.02$ ). Among children 24-29 months of  
302 age, those in intervention villages had significantly higher Z-scores compared to children in  
303 control villages (-0.14 versus -0.53 respectively,  $p<0.01$ ). Among children 30-35 months of  
304 age, those in intervention villages had significantly higher Z-scores relative to children in  
305 control villages (-0.38 versus -0.91 respectively,  $p<0.01$ ).

306

307 **Figure 5.** *Norm-referenced child development Z-scores for children under 3 years of*  
308 *age in intervention and control villages as part of an evaluation of a nutrition-sensitive*  
309 *agroecology program in Andhra Pradesh, India.*

## 310 **Discussion**

311 In this cross-sectional program evaluation, we explored differences in dietary diversity,  
312 nutritional status, and child development between adults and children in villages receiving a  
313 nutrition-sensitive agroecological intervention and control villages where only an  
314 agroecological intervention was implemented. We found that women, children, and men in  
315 intervention villages had more diverse diets and consumed more naturally farmed foods  
316 relative to those in control villages. Children under 2 years of age also had improved  
317 hemoglobin status. Child development scores were also higher in intervention villages  
318 compared to control, particularly among older children 24-36 months of age. These findings  
319 suggest that the additional nutrition-sensitive activities implemented in intervention villages  
320 were effective in improving diets, nutrition, and child development.

321 The findings from our evaluation show that the intervention villages tended to have  
322 more diverse diets compared to control villages. These values are slightly higher (indicating  
323 slightly better feeding practices) than NFHS-5 for rural Andhra Pradesh (6% of breastfed  
324 children had an adequate diet versus 11% in our evaluation). The higher consumption of eggs  
325 and green leafy vegetables in the intervention villages may be attributed to various nutrition-  
326 sensitive initiatives undertaken as part of the intervention such as homestead food production  
327 including backyard poultry and nutri-gardens. The findings from this evaluation align with the  
328 results obtained in other studies conducted in India, where planting of nutri gardens was also  
329 associated with increased consumption of eggs and green leafy vegetables (10,11).

330 Consumption of eggs and vitamin A-rich fruit and vegetables was higher in children 6-  
331 24 months age in intervention villages. Similarly, children older than 2 years of age consumed  
332 more eggs, vitamin A-rich fruits and vegetables, dark green leafy vegetables, dairy products,  
333 other fruits, flesh foods and nuts compared to their counterparts in the control villages. These



334 findings support the effectiveness of nutri-gardens and BCC activities aimed at influencing the  
335 feeding practices in increasing the consumption of diverse foods.

336 Despite having more diverse diets, children under 2 years of age and mothers in  
337 intervention villages were more likely to be underweight than those in control villages. The  
338 findings may be partly explained by the fact that intervention villages were more likely to be  
339 tribal villages than control villages, and tribal villages historically have higher levels of  
340 underweight (28). Another explanation for this counter-intuitive finding could be differences  
341 in measurement instruments used in intervention versus control villages with NFFs in control  
342 villages being more likely to use an analogue scale as compared to NFFs in intervention  
343 villages (98% versus 91%, respectively,  $p < 0.01$ ). The scales used reflected the scales available  
344 at Anganwadi Centers as these were used for the evaluation.

345 Despite the nutrition-sensitive agroecology program, moderate and mild anemia were  
346 common in intervention and control villages. This could be partly explained by the complex  
347 etiology of anemia – it is not just diet that contributes. In addition, water and sanitation access  
348 and behaviors could influence the absorption of nutrients, which in turn could influence anemia  
349 (29). In addition, the high prevalence of anemia in children under 2 years of age in our sample  
350 (90%) could be due to the instrument used to measure hemoglobin. For example, NFHS-5,  
351 which uses capillary blood, estimated a prevalence of anemia among children under 5 years of  
352 age in Andhra Pradesh of 63% (17). In contrast, the Comprehensive National Nutrition Survey  
353 (CNNS, 2016-18), which uses venous blood, estimated a prevalence in the same age group of  
354 40% (30). The Mission® Hb device used in this evaluation is a point-of-care device which uses  
355 capillary blood. A study in Malaysia showed that the Mission® Plus Hb device underestimated  
356 hemoglobin relative to the gold standard cyanmethemoglobin method (31), which would result  
357 in an over-estimation of anemia prevalence.

358           Nonetheless, both intervention and control villages in our evaluation used the same  
359 device and so this measurement error was not differential between intervention and control  
360 villages. We observed that while there were no statistically significant differences in women’s  
361 anemia status, children in intervention villages were less likely to be anemic than children in  
362 control villages. This is especially notable considering the fact that intervention villages were  
363 more likely to be tribal villages, where the baseline anemia prevalence tends to be higher (32).  
364 This improved anemia status in children could be explained by the improved diets among  
365 children in intervention villages.

366           We also found large, consistent, and beneficial effects on child development, with larger  
367 benefits among older children 24-36 months of age. There are several plausible explanations  
368 for this. First, children in intervention villages may have had lower pesticide exposure due to  
369 eating naturally farmed foods. Organophosphorus pesticides, which are commonly used in  
370 Andhra Pradesh(33), are known acetylcholinesterase inhibitors contributing to neurocognitive  
371 impairment in children (15). Second, children in intervention villages were slightly less likely  
372 to have anemia, a known risk factor for suboptimal child development (34). Together with  
373 improved diet and better dietary diversity scores, this may have improved their energy levels  
374 and thus their engagement with caregivers and ultimately their development.

375           Our results from a single time point of a non-randomized intervention should be  
376 interpreted with caution. To estimate the combined effects of natural farming with and without  
377 nutrition-sensitive activities, a randomized control trial should be conducted to establish the  
378 causal relationship. Co-Benefits of Large-Scale Organic Farming on Human Health (BLOOM)  
379 is an upcoming cluster-randomized evaluation looking at the effectiveness of APCNF on  
380 urinary pesticides and dietary diversity (35). Further, randomized evaluations are needed to  
381 assess the additional benefits of nutrition-sensitive activities and to help disentangle which

382 component of the nutrition-sensitive package worked (homestead food production, BCC,  
383 nutrition counselling, or cooking demonstrations) or whether it was the package as a whole.

384 Additional limitations include women reporting the dietary diversity of men and  
385 children (particularly for older children who may eat a lot outside the home) (36), which could  
386 have led to reporting bias. Moreover, the reported dietary data does not include information on  
387 quantities or micronutrient intake, which would help us better understand the deficiencies and  
388 the possible solutions to tackle them. Also, the women may have over-reported their  
389 consumption of healthy foods emphasized during BCC sessions since the data collectors (the  
390 NFFs) were also the implementers, leading to a social-desirability bias. As mentioned above,  
391 there were also differences in anthropometric measures by use of different scales (analogue vs  
392 digital). Future studies should use digital scales to measure weight and venous blood samples  
393 to measure anemia to get more accurate estimates.

## 394 **Conclusion**

395 In conclusion, this nutrition-sensitive agroecological program improved women, men,  
396 and child dietary diversity, reduced anemia in children under 2 years of age, and improved  
397 child development in children under 3 years of age. These findings suggest that the nutrition-  
398 sensitive activities (homestead food production, BCC, cooking demonstration, and nutrition  
399 counselling) were effective. Effects on child development were likely also achieved through  
400 the increased consumption of naturally farmed foods. The policy direction provided by the  
401 Ministry of Women and Child Development, Government of India, in establishing Poshan  
402 Vatikas (nutri-gardens) at Anganwadi Centers under Mission POSHAN could benefit from  
403 integrating agroecological principles. Integrating nutrition-sensitive interventions with  
404 agroecological interventions can be more effective and aid the achievement of ‘Anemia mukt  
405 Bharat’ (Anemia Free India). These initiatives will not only enhance food availability,  
406 accessibility, and consumption at the household level, but also contribute to safeguarding

407 against the adverse effects of pesticides. The Government of India's commitment to  
408 agroecological practices (i.e., natural farming) was recently reaffirmed in the 2023-24 budget  
409 speech which announced that over the next three years, the government will facilitate 10  
410 million farmers to adopt these practices (37). Our evaluation of a nutrition-sensitive  
411 agroecological program in Andhra Pradesh suggests that better outcomes can be achieved if  
412 synergies are leveraged between various departments towards achieving holistic nutrition and  
413 development.

414

## 415 **References**

- 416 1. Hindu T. India ranks 107th out of 121 countries on Global Hunger Index - The Hindu  
417 [Internet]. [cited 2023 Feb 18]. Available from:  
418 [https://www.thehindu.com/news/national/india-ranks-107-out-of-121-countries-on-](https://www.thehindu.com/news/national/india-ranks-107-out-of-121-countries-on-global-hunger-index/article66010797.ece)  
419 [global-hunger-index/article66010797.ece](https://www.thehindu.com/news/national/india-ranks-107-out-of-121-countries-on-global-hunger-index/article66010797.ece)
- 420 2. RBI cuts FY23 GDP growth forecast to 6.8% from 7% - Times of India [Internet].  
421 [cited 2023 Feb 18]. Available from:  
422 [https://timesofindia.indiatimes.com/business/india-business/rbi-cuts-fy23-gdp-growth-](https://timesofindia.indiatimes.com/business/india-business/rbi-cuts-fy23-gdp-growth-forecast-to-6-8-from-7/articleshow/96071050.cms)  
423 [forecast-to-6-8-from-7/articleshow/96071050.cms](https://timesofindia.indiatimes.com/business/india-business/rbi-cuts-fy23-gdp-growth-forecast-to-6-8-from-7/articleshow/96071050.cms)
- 424 3. International Institute for Population Sciences. National Family Health Survey - 5  
425 2019-21. *Minist Heal Fam Welf Natl.* 2020;361:2.
- 426 4. IIPS. National Family Health Survey 2015-16. 2016;
- 427 5. Ministry of Women and Child Development. Saksham Anganwadi and Poshan 2.0 :  
428 Scheme Guidelines. 2022; Available from: [https://wcd.nic.in/acts/guidelines-mission-](https://wcd.nic.in/acts/guidelines-mission-saksham-anganwadi-and-poshan-20)  
429 [saksham-anganwadi-and-poshan-20](https://wcd.nic.in/acts/guidelines-mission-saksham-anganwadi-and-poshan-20)
- 430 6. Vijayalakshmi K, Swamy GN, Jyothi GLS. A study on nutritional security and  
431 economic empowerment of women through homestead nutrigardens in Nellore district  
432 of Andhra Pradesh. 2020;9(4):207–12.
- 433 7. Bird FA, Pradhan A, Bhavani R V, Dangour AD, Asia S. Interventions in agriculture  
434 for nutrition outcomes : A systematic review focused on South Asia. 2019;82(October  
435 2018):39–49.
- 436 8. Pradhan A, Sathanandhan R, Panda AK, Wagh R. Improving Household Diet  
437 Diversity Through Promotion of Nutrition Gardens in India. 2018;5(2):43–51.

- 438 9. Suri S. Nutrition Gardens : A Sustainable Model for Food Security and Diversity.  
439 2020;(June).
- 440 10. Vishnuvardhan PVVSM, Mahtab R. Impact of Enriching the Diet of Women and  
441 Children Through Health and Nutrition Education , Introduction of Homestead  
442 Gardens and Backyard Poultry in Rural India. *Agric Res.* 2016;5(2):210–7.
- 443 11. Narayana. Narayanan 2011\_Home gardens Odisha.pdf.
- 444 12. Ogutu SO, Mockshell J, Garrett J, Labarta R, Ritter T, Martey E, et al. Home gardens ,  
445 household nutrition and income in rural farm households in Odisha , India.  
446 2023;(January):1–20.
- 447 13. Ruel MT, Quisumbing AR, Balagamwala M. Nutrition-sensitive agriculture: What  
448 have we learned so far? *Glob Food Sec* [Internet]. 2018;17(September 2017):128–53.  
449 Available from: <https://doi.org/10.1016/j.gfs.2018.01.002>
- 450 14. Bliznashka L, Roy A, Jaacks LM. Pesticide exposure and child growth in low- and  
451 middle-income countries : A systematic review. *Environ Res* [Internet].  
452 2022;215(P1):114230. Available from: <https://doi.org/10.1016/j.envres.2022.114230>
- 453 15. Sapbamrer R. Effects of prenatal and postnatal exposure to organophosphate pesticides  
454 on child neurodevelopment in different age groups : a systematic review. 2019;18267–  
455 90.
- 456 16. Agriculture Department Andhra Pradesh. Agriculture Action Plan for the Year 2017-  
457 18. Available from: <https://apagrisnet.gov.in/2017/Agri Action Plan 2017-18>  
458 (English)/1 Introduction.pdf
- 459 17. NFHS-5. National Family Health Survey 2015-2016 State Fact Sheet: Andhra Pradesh.  
460 Available from: [http://rchiips.org/nfhs/pdf/NFHS4/AP\\_FactSheet.pdf](http://rchiips.org/nfhs/pdf/NFHS4/AP_FactSheet.pdf)

- 461 18. RySS. Andhra Pradesh Community Managed Natural Farming [Internet]. [cited 2023  
462 Feb 23]. Available from: <https://apcnf.in/>
- 463 19. Reddy N. Agroecology and Sustainable Smallholder agriculture: An exploratory  
464 analysis with some tentative indications from the recent experiences from Natural  
465 Farming in Andhra Pradesh. *Indian Assoc Soc Sci Institutions*. 2022;41(3):233–71.
- 466 20. FAO. Minimum dietary diversity for women. FAO; 2021.
- 467 21. World Health Organization, United Nations Children’s Fund. Indicators for assessing  
468 infant and young child feeding practices: definitions and measurement methods.  
469 Geneva.; 2021.
- 470 22. WHO Multicentre Growth Reference Study Group. WHO child growth standards:  
471 Length/height-for-age, weight-for-age, weight-for-length, weight-for-height and body  
472 mass index-for-age: methods and development. Geneva; 2006.
- 473 23. WHO. Haemoglobin concentrations for the diagnosis of anaemia and assessment of  
474 severity. Geneva, Switz World Heal Organ [Internet]. 2011;1–6. Available from:  
475 [http://scholar.google.com/scholar?hl=en&btnG=Search&q=intitle:Haemoglobin+conc](http://scholar.google.com/scholar?hl=en&btnG=Search&q=intitle:Haemoglobin+concentrations+for+the+diagnosis+of+anaemia+and+assessment+of+severity#1)  
476 [entrations+for+the+diagnosis+of+anaemia+and+assessment+of+severity#1](http://scholar.google.com/scholar?hl=en&btnG=Search&q=intitle:Haemoglobin+concentrations+for+the+diagnosis+of+anaemia+and+assessment+of+severity#1)
- 477 24. McCoy DC, Waldman M, Fink G. Measuring early childhood development at a global  
478 scale: Evidence from the Caregiver-Reported Early Development Instruments. *Early*  
479 *Child Res Q*. 2018 Oct 1;45:58–68.
- 480 25. Mccoy DC. Assessor manual. 2022;
- 481 26. Seiden J, Waldman M, Mccoy DC, Fink G. Data Management & Scoring Manual.  
482 2021;
- 483 27. Ishan Kukreti. India’s tribal village infrastructure in a shambles [Internet]. Down to

- 484 Earth. 2019 [cited 2023 Mar 2]. Available from:  
485 [https://www.downtoearth.org.in/news/forests/india-s-tribal-village-infrastructure-in-a-](https://www.downtoearth.org.in/news/forests/india-s-tribal-village-infrastructure-in-a-shambles-67800)  
486 [shambles-67800](https://www.downtoearth.org.in/news/forests/india-s-tribal-village-infrastructure-in-a-shambles-67800)
- 487 28. Uposoma Dey SB. The prevalence of under-nutrition among the tribal children in  
488 India: a systematic review. *Anthropol Rev.* 2019;82(2):191–202.
- 489 29. Balarajan Y, Ramakrishnan U, Özaltın E, Shankar AH, Subramanian S V. Anaemia in  
490 low-income and middle-income countries. *Lancet* [Internet]. 2011 Dec 17 [cited 2023  
491 Jan 25];378(9809):2123–35. Available from:  
492 <http://www.thelancet.com/article/S0140673610623045/fulltext>
- 493 30. Ministry of Health and Family Welfare Government of India. Comprehensive National  
494 Nutrition Survey 2016-2018. *Minist Heal Fam Welf Gov India* [Internet].  
495 2019;4(1):290. Available from:  
496 <https://nhm.gov.in/WriteReadData/l892s/1405796031571201348.pdf>
- 497 31. De La Cruz-Góngora V, Méndez-Gómez-Humarán I, Gaona-Pineda EB, Shamah-Levy  
498 T, Dary O. Drops of capillary blood are not appropriate for hemoglobin measurement  
499 with HemoCue: A comparative study using drop capillary, pooled capillary, and  
500 venous blood samples. *Res Sq (Under Rev)* [Internet]. 2022;TBD(TBD). Available  
501 from: <https://doi.org/10.21203/rs.3.rs-1875378/v1>
- 502 32. Balarajan YS, Fawzi WW, Subramanian S V. Changing patterns of social inequalities  
503 in anaemia among women in india: Cross-sectional study using nationally  
504 representative data. *BMJ Open.* 2013;3(3).
- 505 33. Jaacks LM, Serupally R, Dabholkar S, Venkateshmurthy NS, Mohan S, Roy A, et al.  
506 Impact of large-scale, government legislated and funded organic farming training on  
507 pesticide use in Andhra Pradesh, India: a cross-sectional study. *Lancet Planet Heal*



- 508 [Internet]. 2022;6(4):e310–9. Available from: <http://dx.doi.org/10.1016/S2542->  
509 5196(22)00062-6
- 510 34. Susan P Walker, Theodore D Wachs, Julie Meeks Gardner, Betsy Lozoff, Gail A  
511 Wasserman, Ernesto Pollitt, Julie A Carter and the ICDSG. Child development: risk  
512 factors for adverse outcomes in developing countries. *Lancet*. 2007;369(3):145–57.
- 513 35. Jaacks LM, Bliznashka L, Id PC, Eddleston M, Gathorne-hardy A, Kumar R, et al. Co-  
514 Benefits of Largescale Organic farming On huMan health ( BLOOM ): Protocol for a  
515 cluster-randomised controlled evaluation of the Andhra Pradesh Community-managed  
516 Natural Farming programme in India. 2023;1–26. Available from:  
517 <http://dx.doi.org/10.1371/journal.pone.0281677>
- 518 36. Gulati S, Misra A, Colles SL, Kondal D, Gupta N, Goel K, et al. Dietary intakes and  
519 familial correlates of overweight/obesity: A four-cities study in India. *Ann Nutr*  
520 *Metab*. 2013;62(4):279–90.
- 521 37. Budget 2023-2024. 2023;1–58. Available from:  
522 [https://www.indiabudget.gov.in/doc/budget\\_speech.pdf](https://www.indiabudget.gov.in/doc/budget_speech.pdf)
- 523
- 524

## 525 **Supplementary Material**

526 Supplementary Table T1: Dietary Diversity Scores among men and women

527 For mothers:

|                                            | <b>Full sample</b> | <b>Intervention villages</b> | <b>Control villages</b> | <b>p-Value</b> |
|--------------------------------------------|--------------------|------------------------------|-------------------------|----------------|
|                                            | <b>Mean ± SD</b>   | <b>Mean ± SD</b>             | <b>Mean ± SD</b>        |                |
| Grains, roots, and tubers                  | 3510 (99.97)       | 1120 (99.91)                 | 2390 (100)              | 0.14           |
| Pulses                                     | 2497 (71.12)       | 854 (76.18)                  | 1643 (68.74)            | 0.00           |
| Nuts and seeds                             | 2083 (59.33)       | 717 (63.96)                  | 1366 (57.15)            | 0.00           |
| Eggs                                       | 1654 (47.11)       | 654 (58.34)                  | 1000 (41.84)            | 0.00           |
| Dairy products                             | 3032 (86.36)       | 1019 (90.9)                  | 2013 (84.23)            | 0.00           |
| Dark green leafy vegetables                | 1530 (43.58)       | 599 (53.43)                  | 931 (38.95)             | 0.00           |
| Other vegetables                           | 3348 (95.36)       | 1052 (93.84)                 | 2296 (96.07)            | 0.00           |
| Other vitamin A-rich fruits and vegetables | 563 (16.04)        | 269 (24)                     | 294 (12.3)              | 0.00           |
| Other fruit                                | 2144 (61.07)       | 752 (67.08)                  | 1392 (58.24)            | 0.00           |
| Flesh foods                                | 836 (23.81)        | 282 (25.16)                  | 554 (23.18)             | 0.20           |
| Dietary diversity score (0-10)             | 6.04±1.63          | 6.53±1.62                    | 5.81±1.58               | 0.00           |
| Met minimum dietary diversity (DDS≥5)      | 2864 (81.57)       | 973 (86.8)                   | 1891 (79.12)            | 0.00           |

528 For men:

|                                            | <b>Full sample</b> | <b>Intervention villages</b> | <b>Control villages</b> | <b>p-Value</b> |
|--------------------------------------------|--------------------|------------------------------|-------------------------|----------------|
|                                            | <b>Mean ± SD</b>   | <b>Mean ± SD</b>             | <b>Mean ± SD</b>        |                |
| Grains, roots, and tubers                  | 3494 (99.52)       | 1114 (99.38)                 | 2380 (99.58)            | 0.41           |
| Pulses                                     | 2406 (68.53)       | 825 (73.6)                   | 1581 (66.15)            | 0.00           |
| Nuts and seeds                             | 1939 (55.23)       | 652 (58.16)                  | 1287 (53.85)            | 0.02           |
| Eggs                                       | 1206 (34.35)       | 524 (46.74)                  | 682 (28.54)             | 0.00           |
| Dairy products                             | 2830 (80.6)        | 985 (87.87)                  | 1845 (77.2)             | 0.00           |
| Dark green leafy vegetables                | 1433 (40.81)       | 564 (50.31)                  | 869 (36.36)             | 0.00           |
| Other vegetables                           | 3327 (94.76)       | 1045 (93.22)                 | 2282 (95.48)            | 0.01           |
| Other vitamin A-rich fruits and vegetables | 483 (13.76)        | 236 (21.05)                  | 247 (10.33)             | 0.00           |
| Other fruit                                | 1811 (51.58)       | 671 (59.86)                  | 1140 (47.7)             | 0.00           |
| Flesh foods                                | 844 (24.04)        | 285 (25.42)                  | 559 (23.39)             | 0.19           |
| Dietary diversity score (0-10)             | 5.63±1.66          | 6.16±1.65                    | 5.39±1.61               | 0.00           |
| Met minimum dietary diversity (DDS≥5)      | 2669 (76.02)       | 934 (83.32)                  | 1735 (72.59)            | 0.00           |

529

530

531 Supplementary Table T2: Dietary Diversity Scores among Children <2 and >2 years age

532 For Children 6-23 months age:

|                                       | <b>Full sample</b> | <b>Intervention villages</b> | <b>Control villages</b> | <b>p-value</b> |
|---------------------------------------|--------------------|------------------------------|-------------------------|----------------|
|                                       | <b>Mean ± SD</b>   | <b>Mean ± SD</b>             | <b>Mean ± SD</b>        |                |
| Grains, roots, and tubers             | 1410 (69.87)       | 474 (69.1)                   | 936 (70.27)             | 0.59           |
| Pulses, nuts, and seeds               | 1232 (61.14)       | 423 (61.66)                  | 809 (60.87)             | 0.73           |
| Dairy products                        | 647 (31.98)        | 216 (31.44)                  | 431 (32.26)             | 0.71           |
| Flesh foods                           | 78 (3.87)          | 29 (4.23)                    | 49 (3.68)               | 0.54           |
| Eggs                                  | 762 (37.67)        | 305 (44.4)                   | 457 (34.21)             | 0.00           |
| Vit- A rich fruits and vegetables     | 734 (36.39)        | 313 (45.69)                  | 421 (31.61)             | 0.00           |
| Other fruits and vegetables           | 837 (41.39)        | 294 (42.86)                  | 543 (40.64)             | 0.34           |
| Dietary diversity score (0-8)         | 3.55±1.54          | 3.71±1.48                    | 3.47±1.56               | 0.00           |
| Met minimum dietary diversity (DDS≥5) | 542 (26.79)        | 207 (30.13)                  | 335 (25.07)             | 0.02           |

533

534 For Children >2 years age:

|                                            | <b>Full sample</b> | <b>Intervention villages</b> | <b>Control villages</b> | <b>p-values</b> |
|--------------------------------------------|--------------------|------------------------------|-------------------------|-----------------|
|                                            | <b>Mean ± SD</b>   | <b>Mean ± SD</b>             | <b>Mean ± SD</b>        |                 |
| Grains, roots, and tubers                  | 2164 (99.95)       | 763 (99.87)                  | 1401 (100)              | 0.18            |
| Pulses                                     | 1740 (80.37)       | 603 (78.93)                  | 1137 (81.16)            | 0.21            |
| Nuts and seeds                             | 1153 (53.26)       | 434 (56.81)                  | 719 (51.32)             | 0.01            |
| Eggs                                       | 1526 (70.48)       | 588 (76.96)                  | 938 (66.95)             | 0.00            |
| Dairy products                             | 1829 (84.48)       | 681 (89.14)                  | 1148 (81.94)            | 0.00            |
| Dark green leafy vegetables                | 996 (46)           | 434 (56.81)                  | 562 (40.11)             | 0.00            |
| Other vegetables                           | 2023 (93.44)       | 685 (89.66)                  | 1338 (95.5)             | 0.00            |
| Other vitamin A-rich fruits and vegetables | 319 (14.73)        | 165 (21.6)                   | 154 (10.99)             | 0.00            |
| Other fruit                                | 1312 (60.6)        | 523 (68.46)                  | 789 (56.32)             | 0.00            |
| Flesh foods                                | 393 (18.15)        | 158 (20.68)                  | 235 (16.77)             | 0.02            |
| Dietary diversity score (0-10)             | 6.21±1.61          | 6.59±1.69                    | 6.01±1.53               | 0.00            |
| Met minimum dietary diversity (DDS≥5)      | 1832 (84.62)       | 660 (86.39)                  | 1172 (83.65)            | 0.09            |

535

536

537

538

539 Supplementary Table T3: Child Development (Z - Scores) among various age groups

|                                | <b>Full sample</b> | <b>Intervention villages</b> | <b>Control villages</b> | <b>p-Value</b> |
|--------------------------------|--------------------|------------------------------|-------------------------|----------------|
|                                | <b>Mean ± SD</b>   | <b>Mean ± SD</b>             | <b>Mean ± SD</b>        |                |
| <i>Child age: 0-5 months</i>   |                    |                              |                         |                |
| N                              | 2910               | 987                          | 1923                    |                |
| OVERALL                        | 47.26±4.6          | 47.79±4.6                    | 46.99±4.58              | 0.00           |
| Z_OVERALL                      | -0.25±1.13         | -0.18±1.19                   | -0.28±1.09              | 0.03           |
| <i>Child age: 6-11 months</i>  |                    |                              |                         |                |
| N                              | 662                | 221                          | 441                     |                |
| OVERALL                        | 45.03±1.84         | 45.23±1.95                   | 44.92±1.78              | 0.04           |
| Z_OVERALL                      | -0.4±1.23          | -0.35±1.38                   | -0.42±1.15              | 0.46           |
| <i>Child age: 12-17 months</i> |                    |                              |                         |                |
| N                              | 646                | 235                          | 411                     |                |
| OVERALL                        | 49.09±1.29         | 49.05±1.36                   | 49.12±1.25              | 0.48           |
| Z_OVERALL                      | -0.19±1.06         | -0.1±1.14                    | -0.24±1.01              | 0.12           |
| <i>Child age: 18-23 months</i> |                    |                              |                         |                |
| N                              | 538                | 185                          | 353                     |                |
| OVERALL                        | 51.58±1.16         | 51.67±1.24                   | 51.53±1.12              | 0.16           |
| Z_OVERALL                      | 0.31±1.09          | 0.46±1.13                    | 0.24±1.06               | 0.02           |
| <i>Child age: 24-29 months</i> |                    |                              |                         |                |
| N                              | 239                | 82                           | 157                     |                |
| OVERALL                        | 52.05±0.88         | 52.3±0.94                    | 51.92±0.82              | 0.00           |
| Z_OVERALL                      | -0.4±0.79          | -0.14±0.8                    | -0.53±0.76              | 0.00           |
| <i>Child age: 30-35 months</i> |                    |                              |                         |                |
| N                              | 175                | 87                           | 88                      |                |
| OVERALL                        | 53.07±0.66         | 53.28±0.6                    | 52.87±0.66              | 0.00           |
| Z_OVERALL                      | -0.64±0.84         | -0.38±0.76                   | -0.91±0.84              | 0.00           |
| <i>Child age: 0-35 months</i>  |                    |                              |                         |                |
| N                              | 2910               | 987                          | 1923                    |                |
| OVERALL                        | 47.26±4.6          | 47.79±4.6                    | 46.99±4.58              | 0.00           |
| Z_OVERALL                      | -0.25±1.13         | -0.18±1.19                   | -0.28±1.09              | 0.03           |

540

541

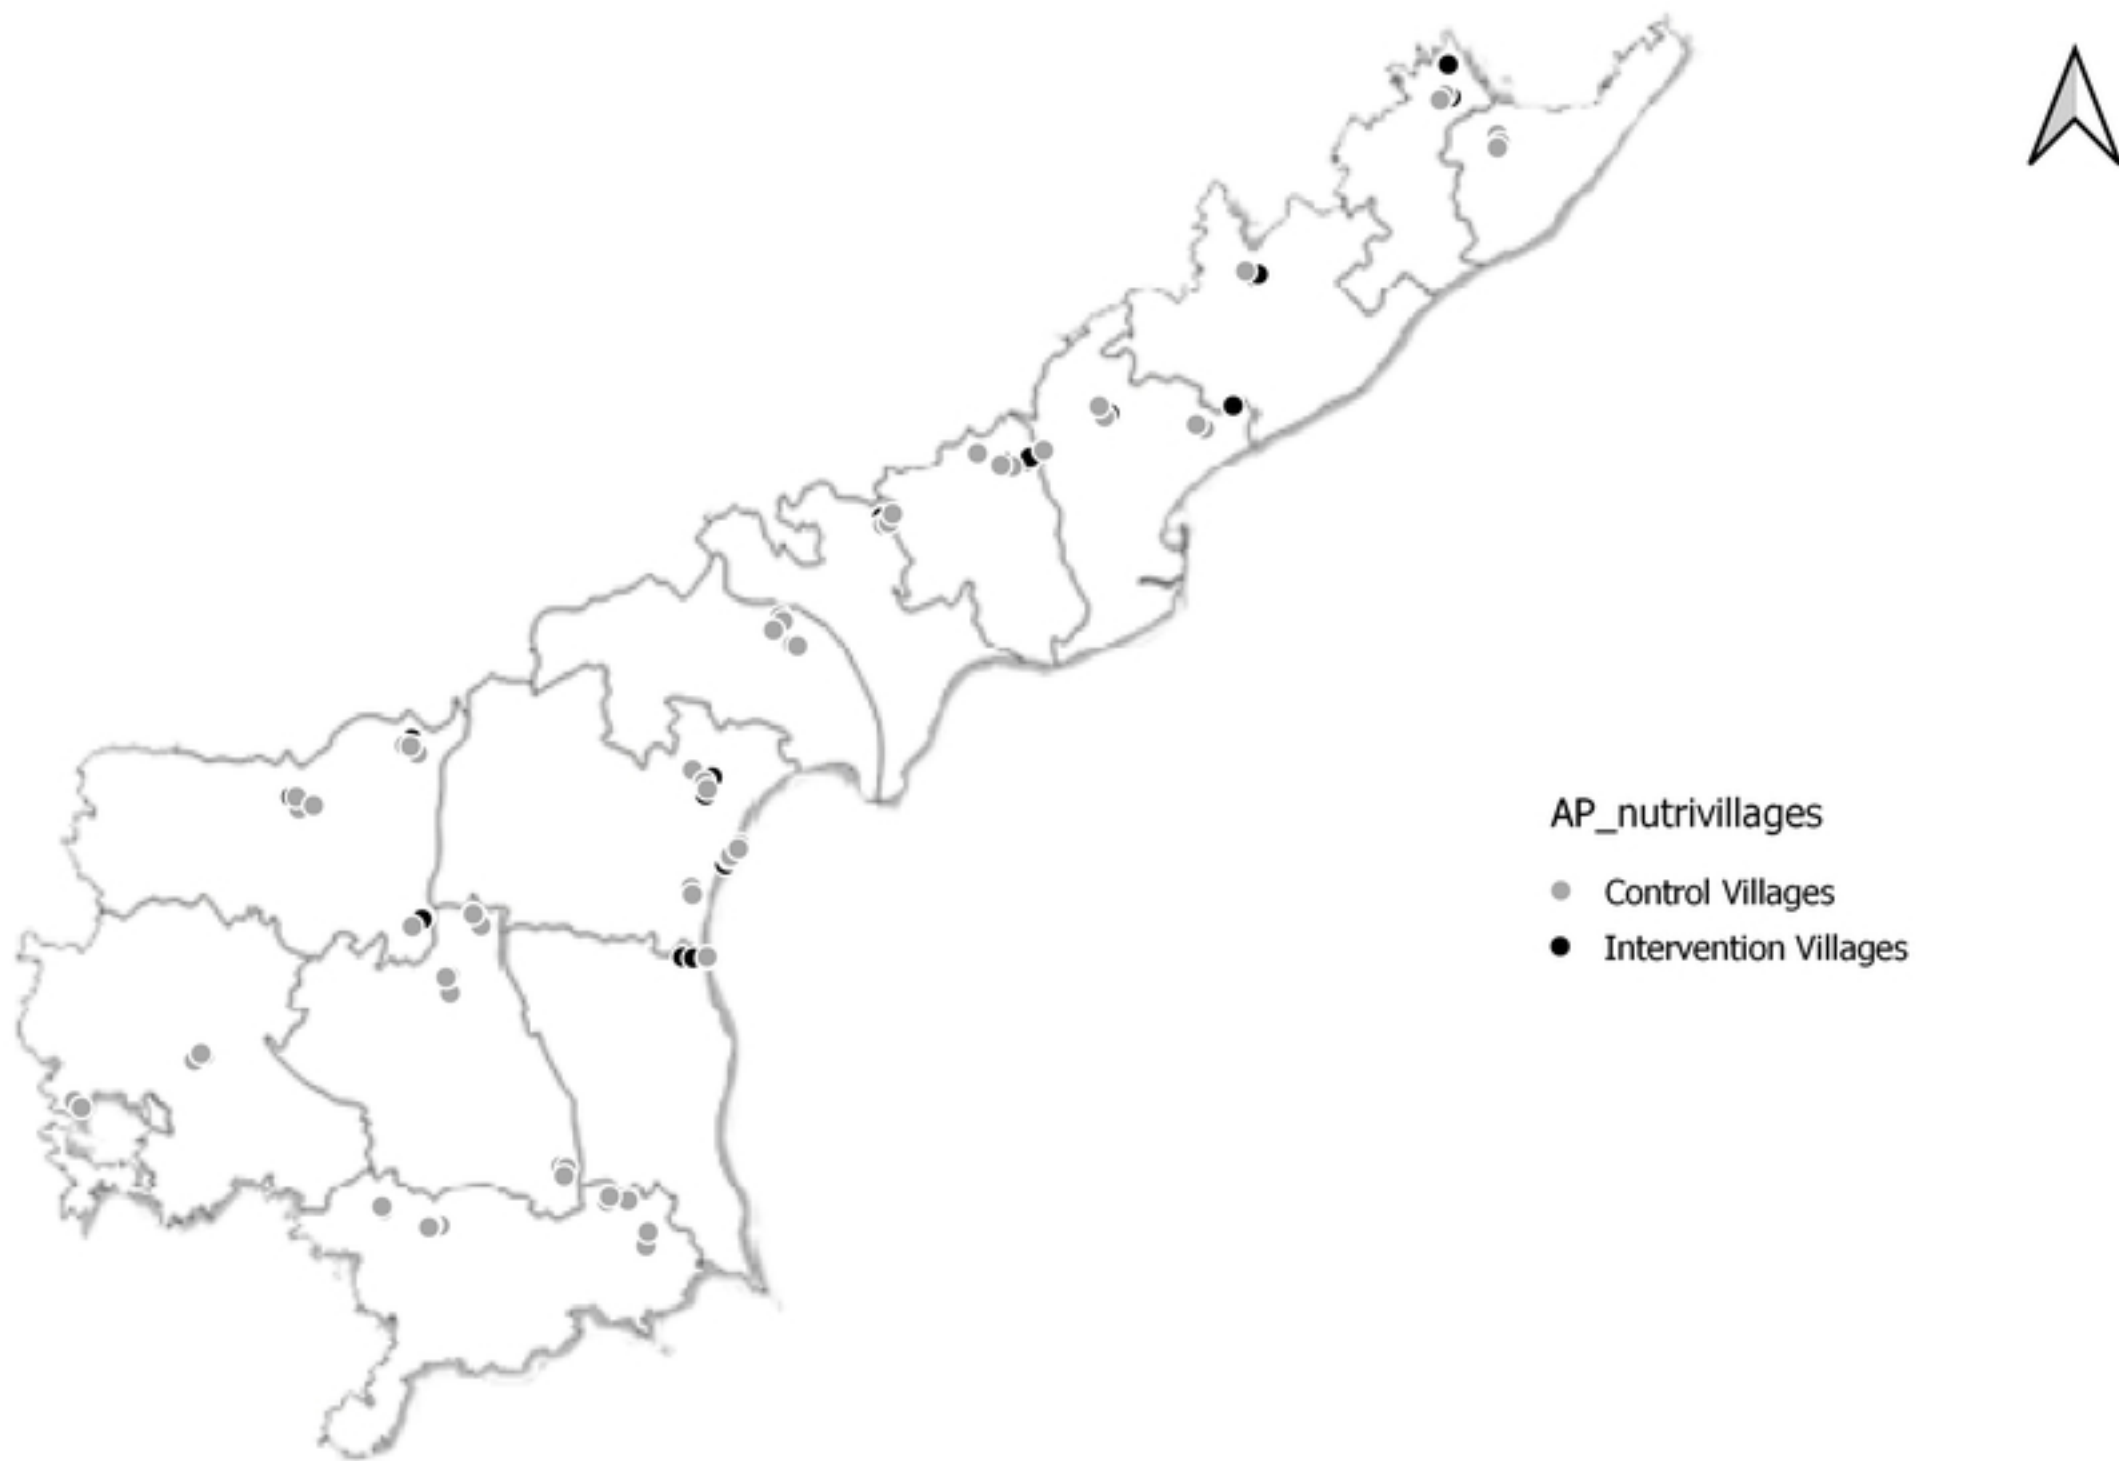

Figure

# 0-5 months

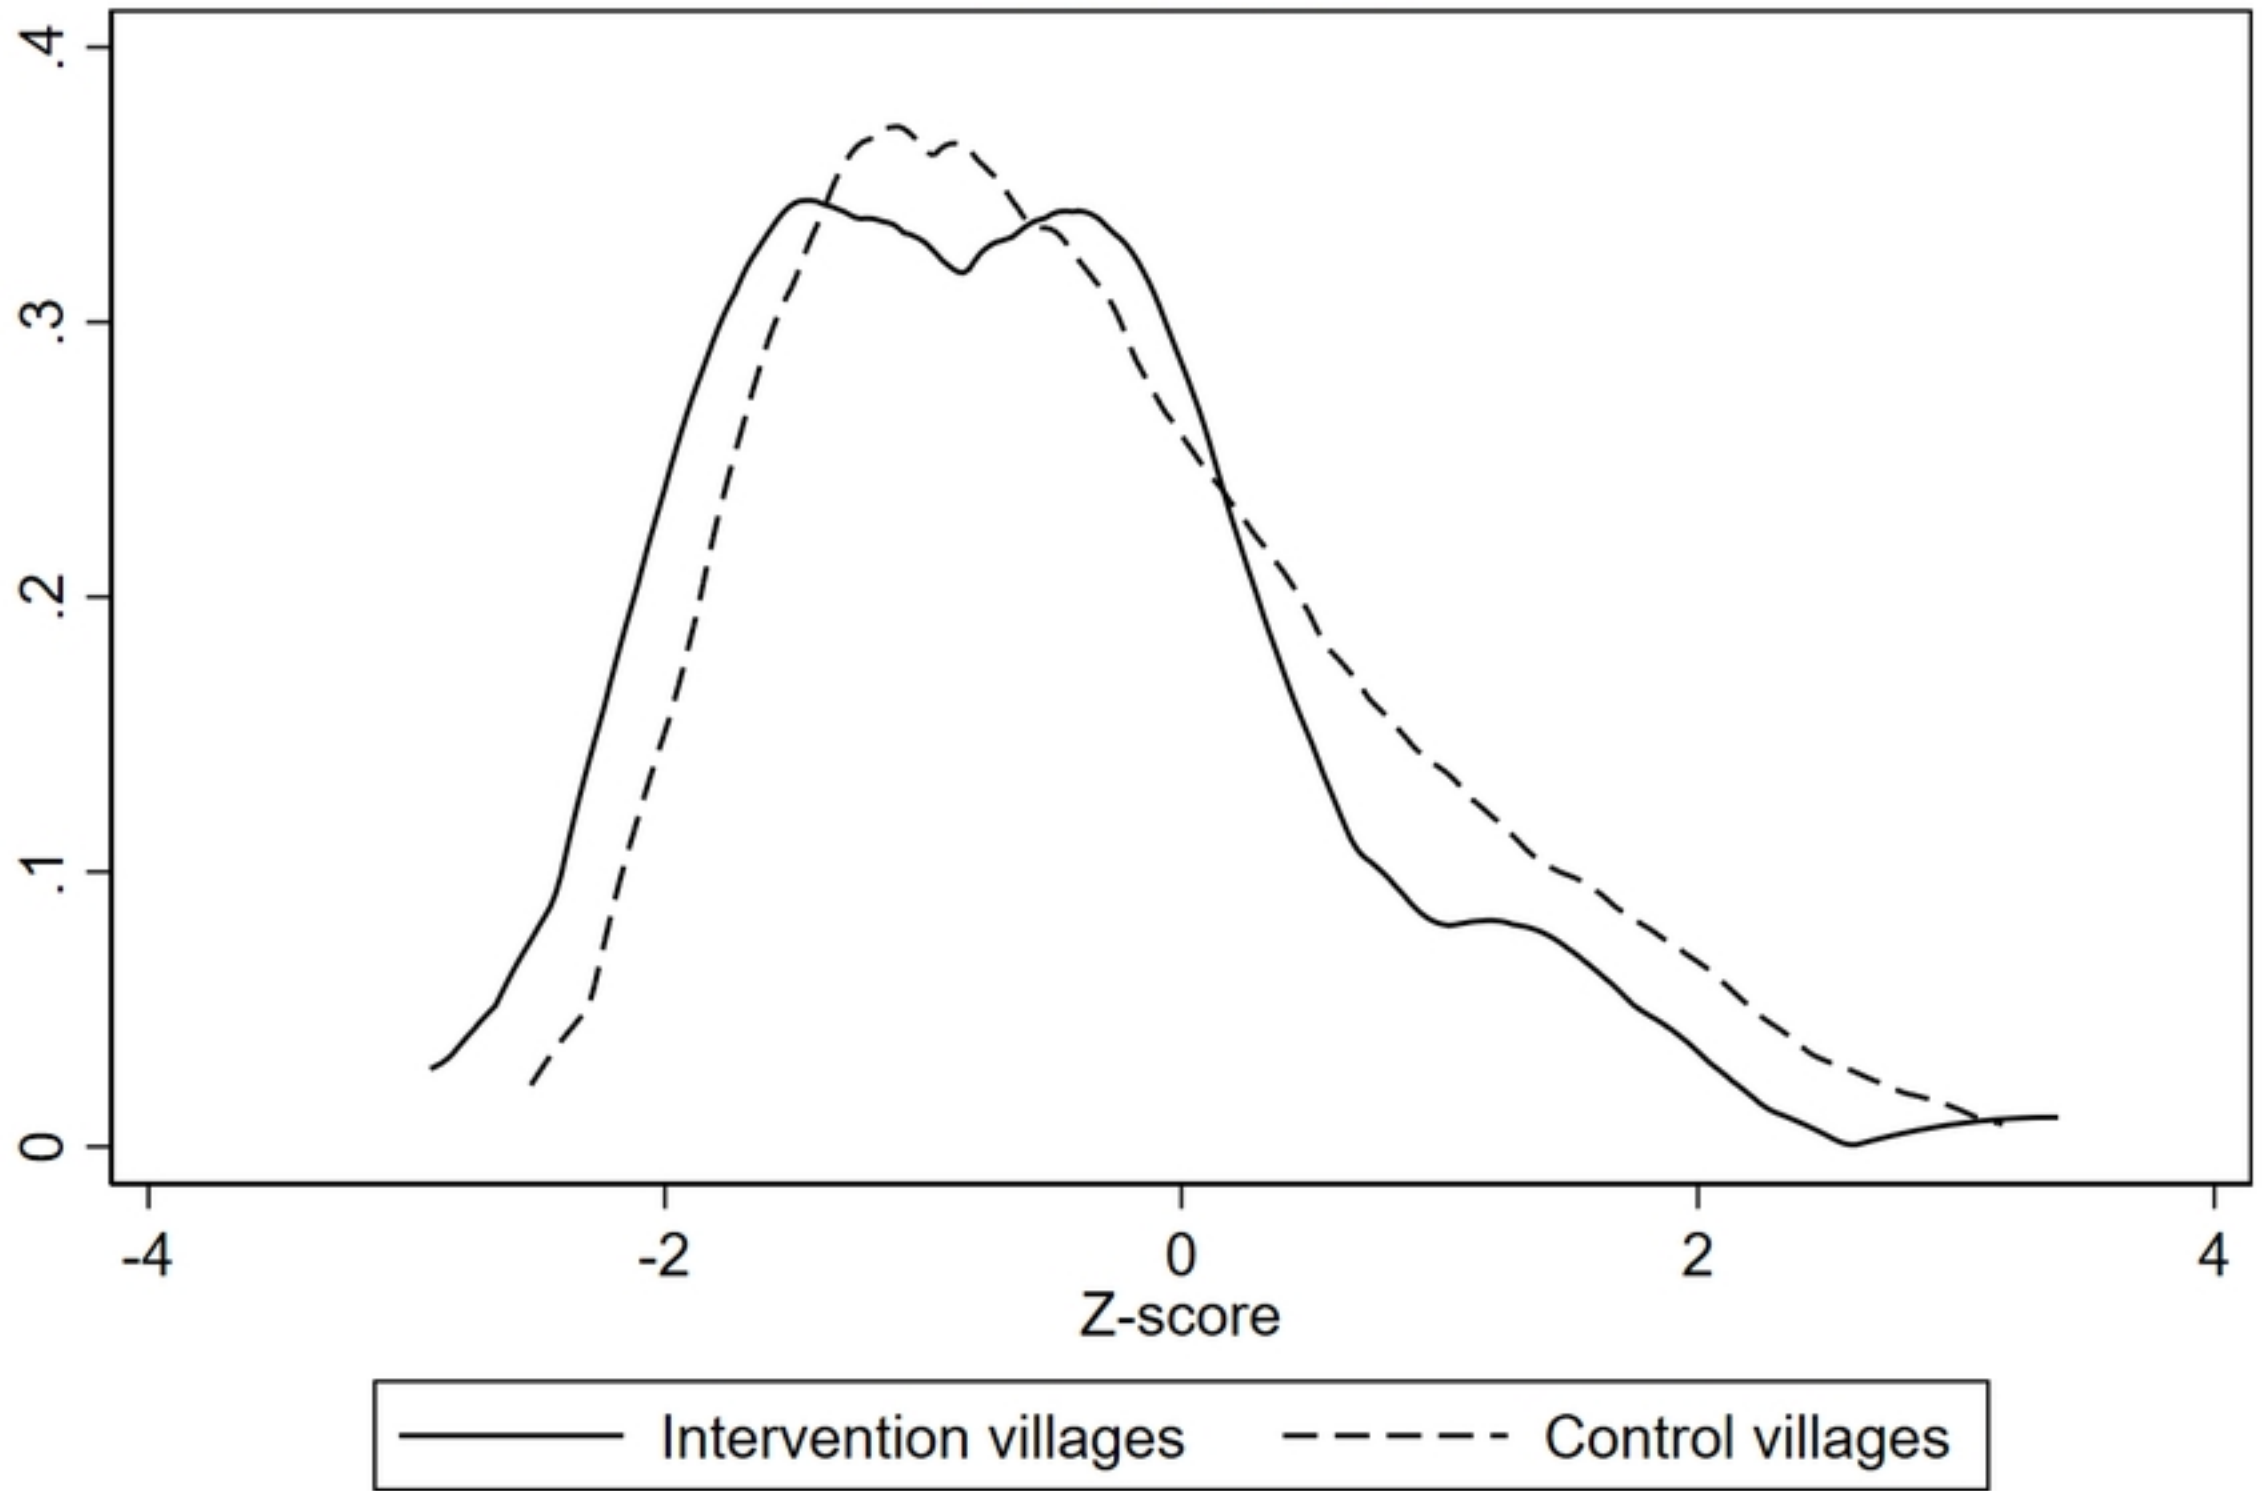

Figure

# 6-11 months

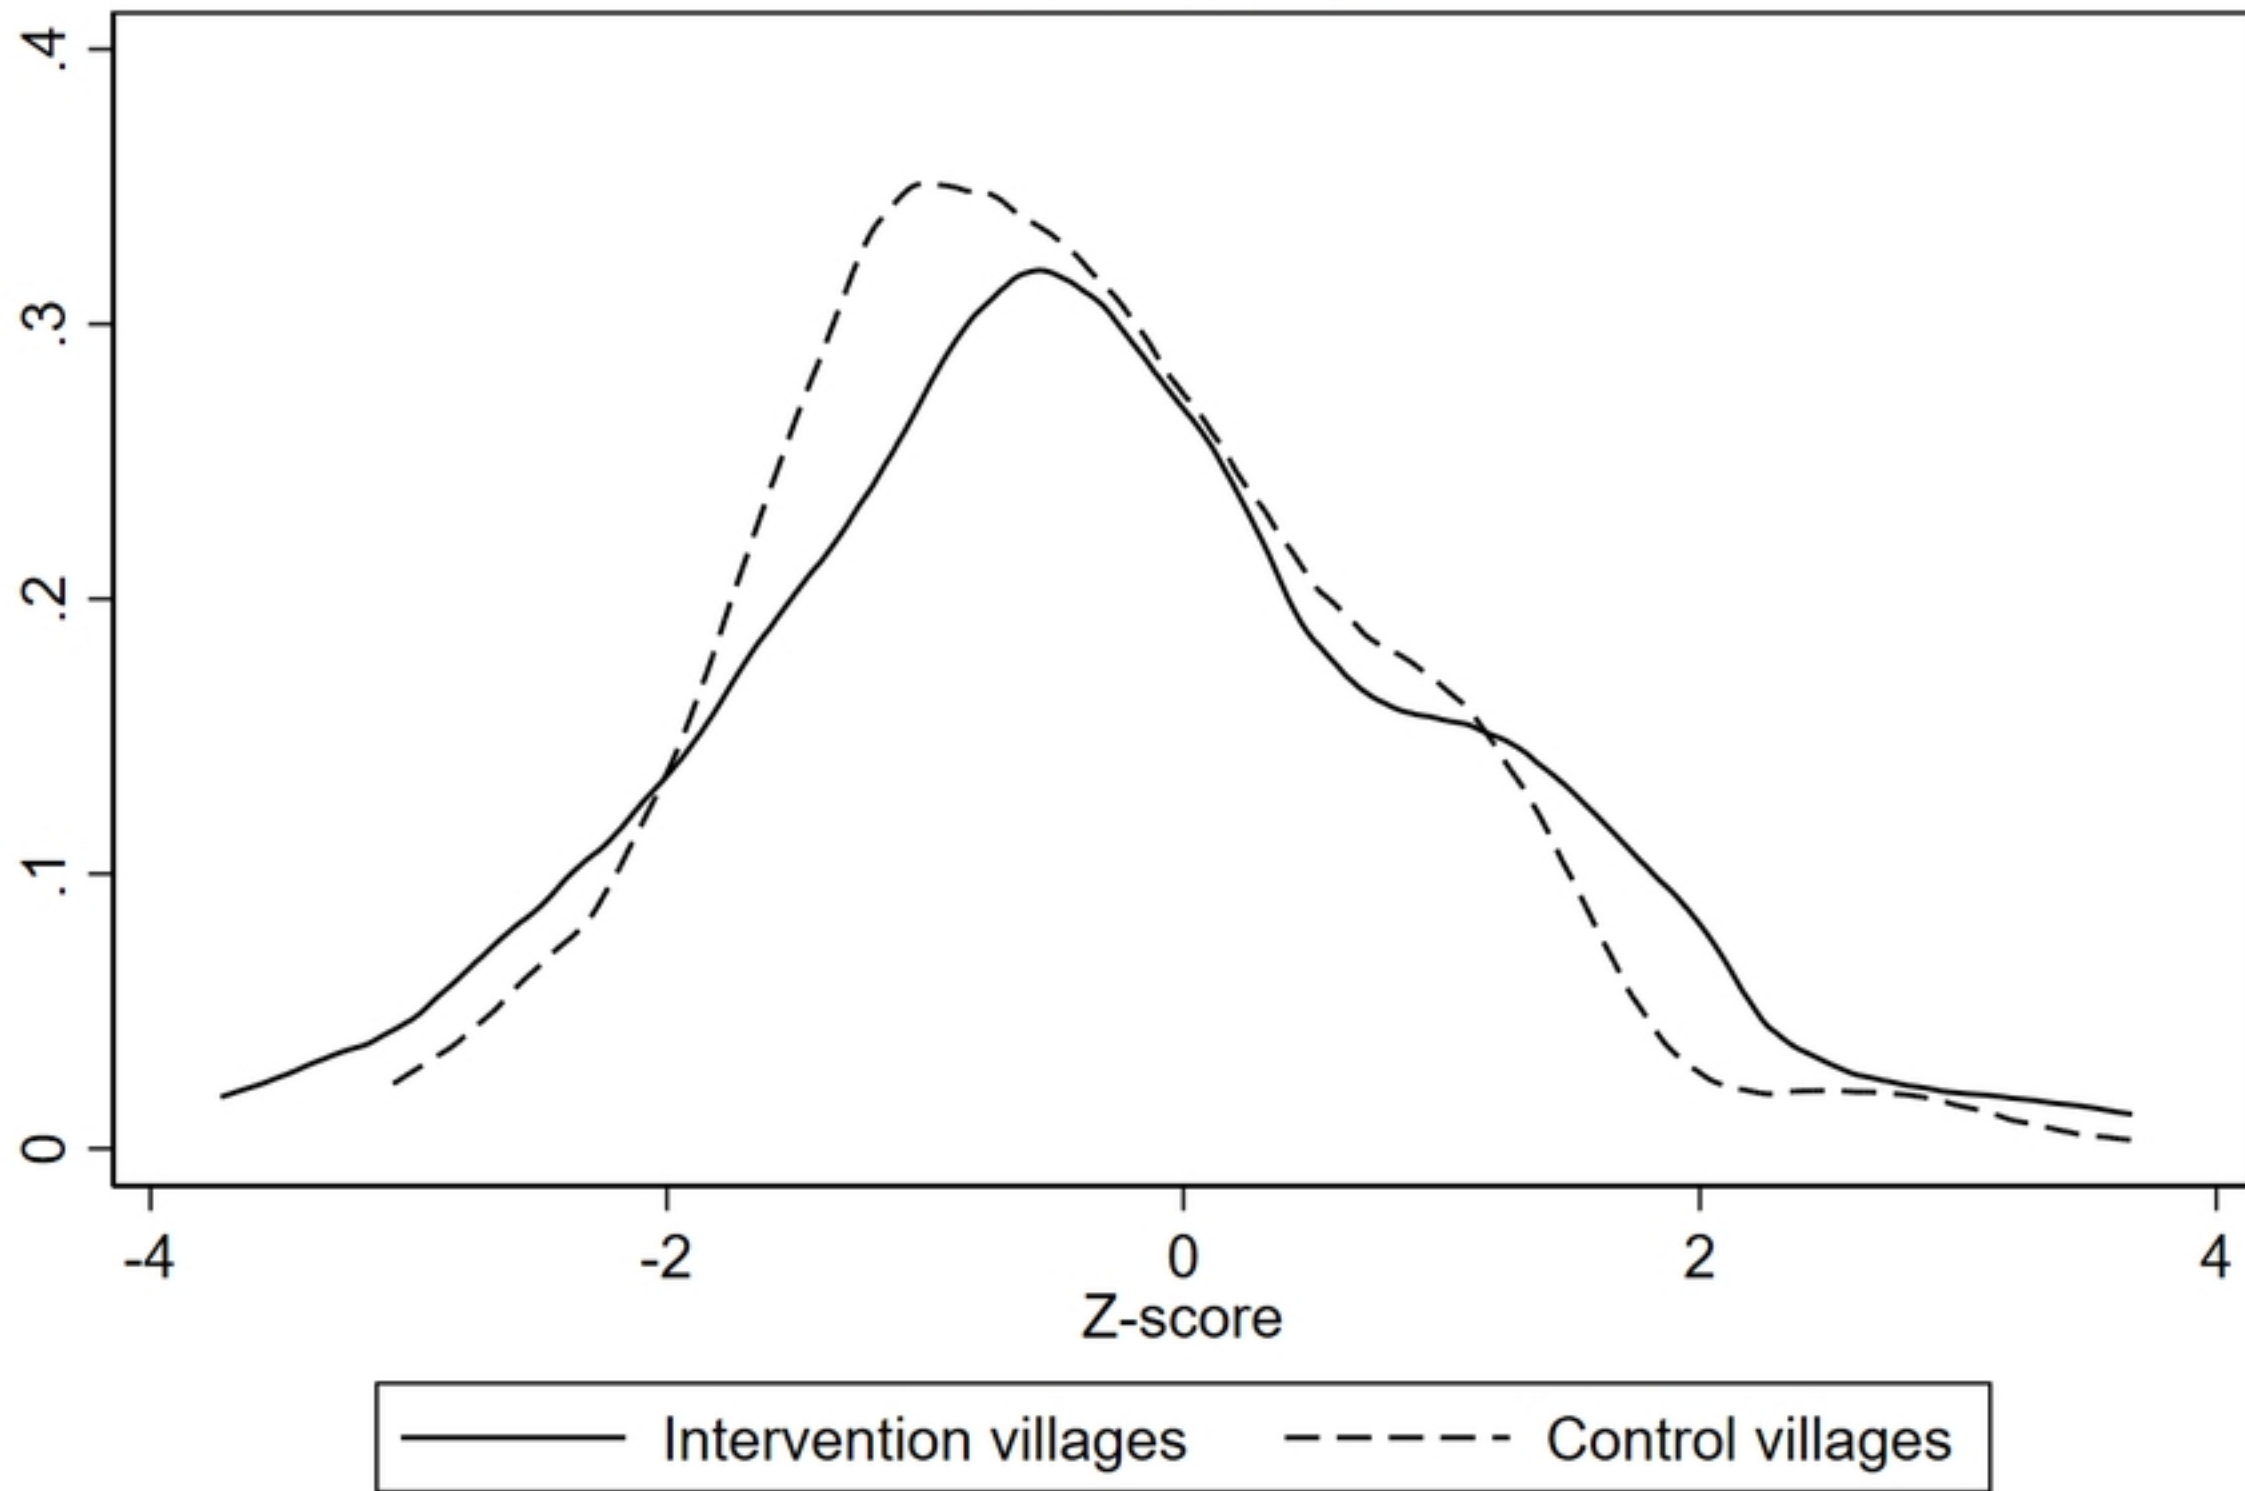

Figure

# 12-17 months

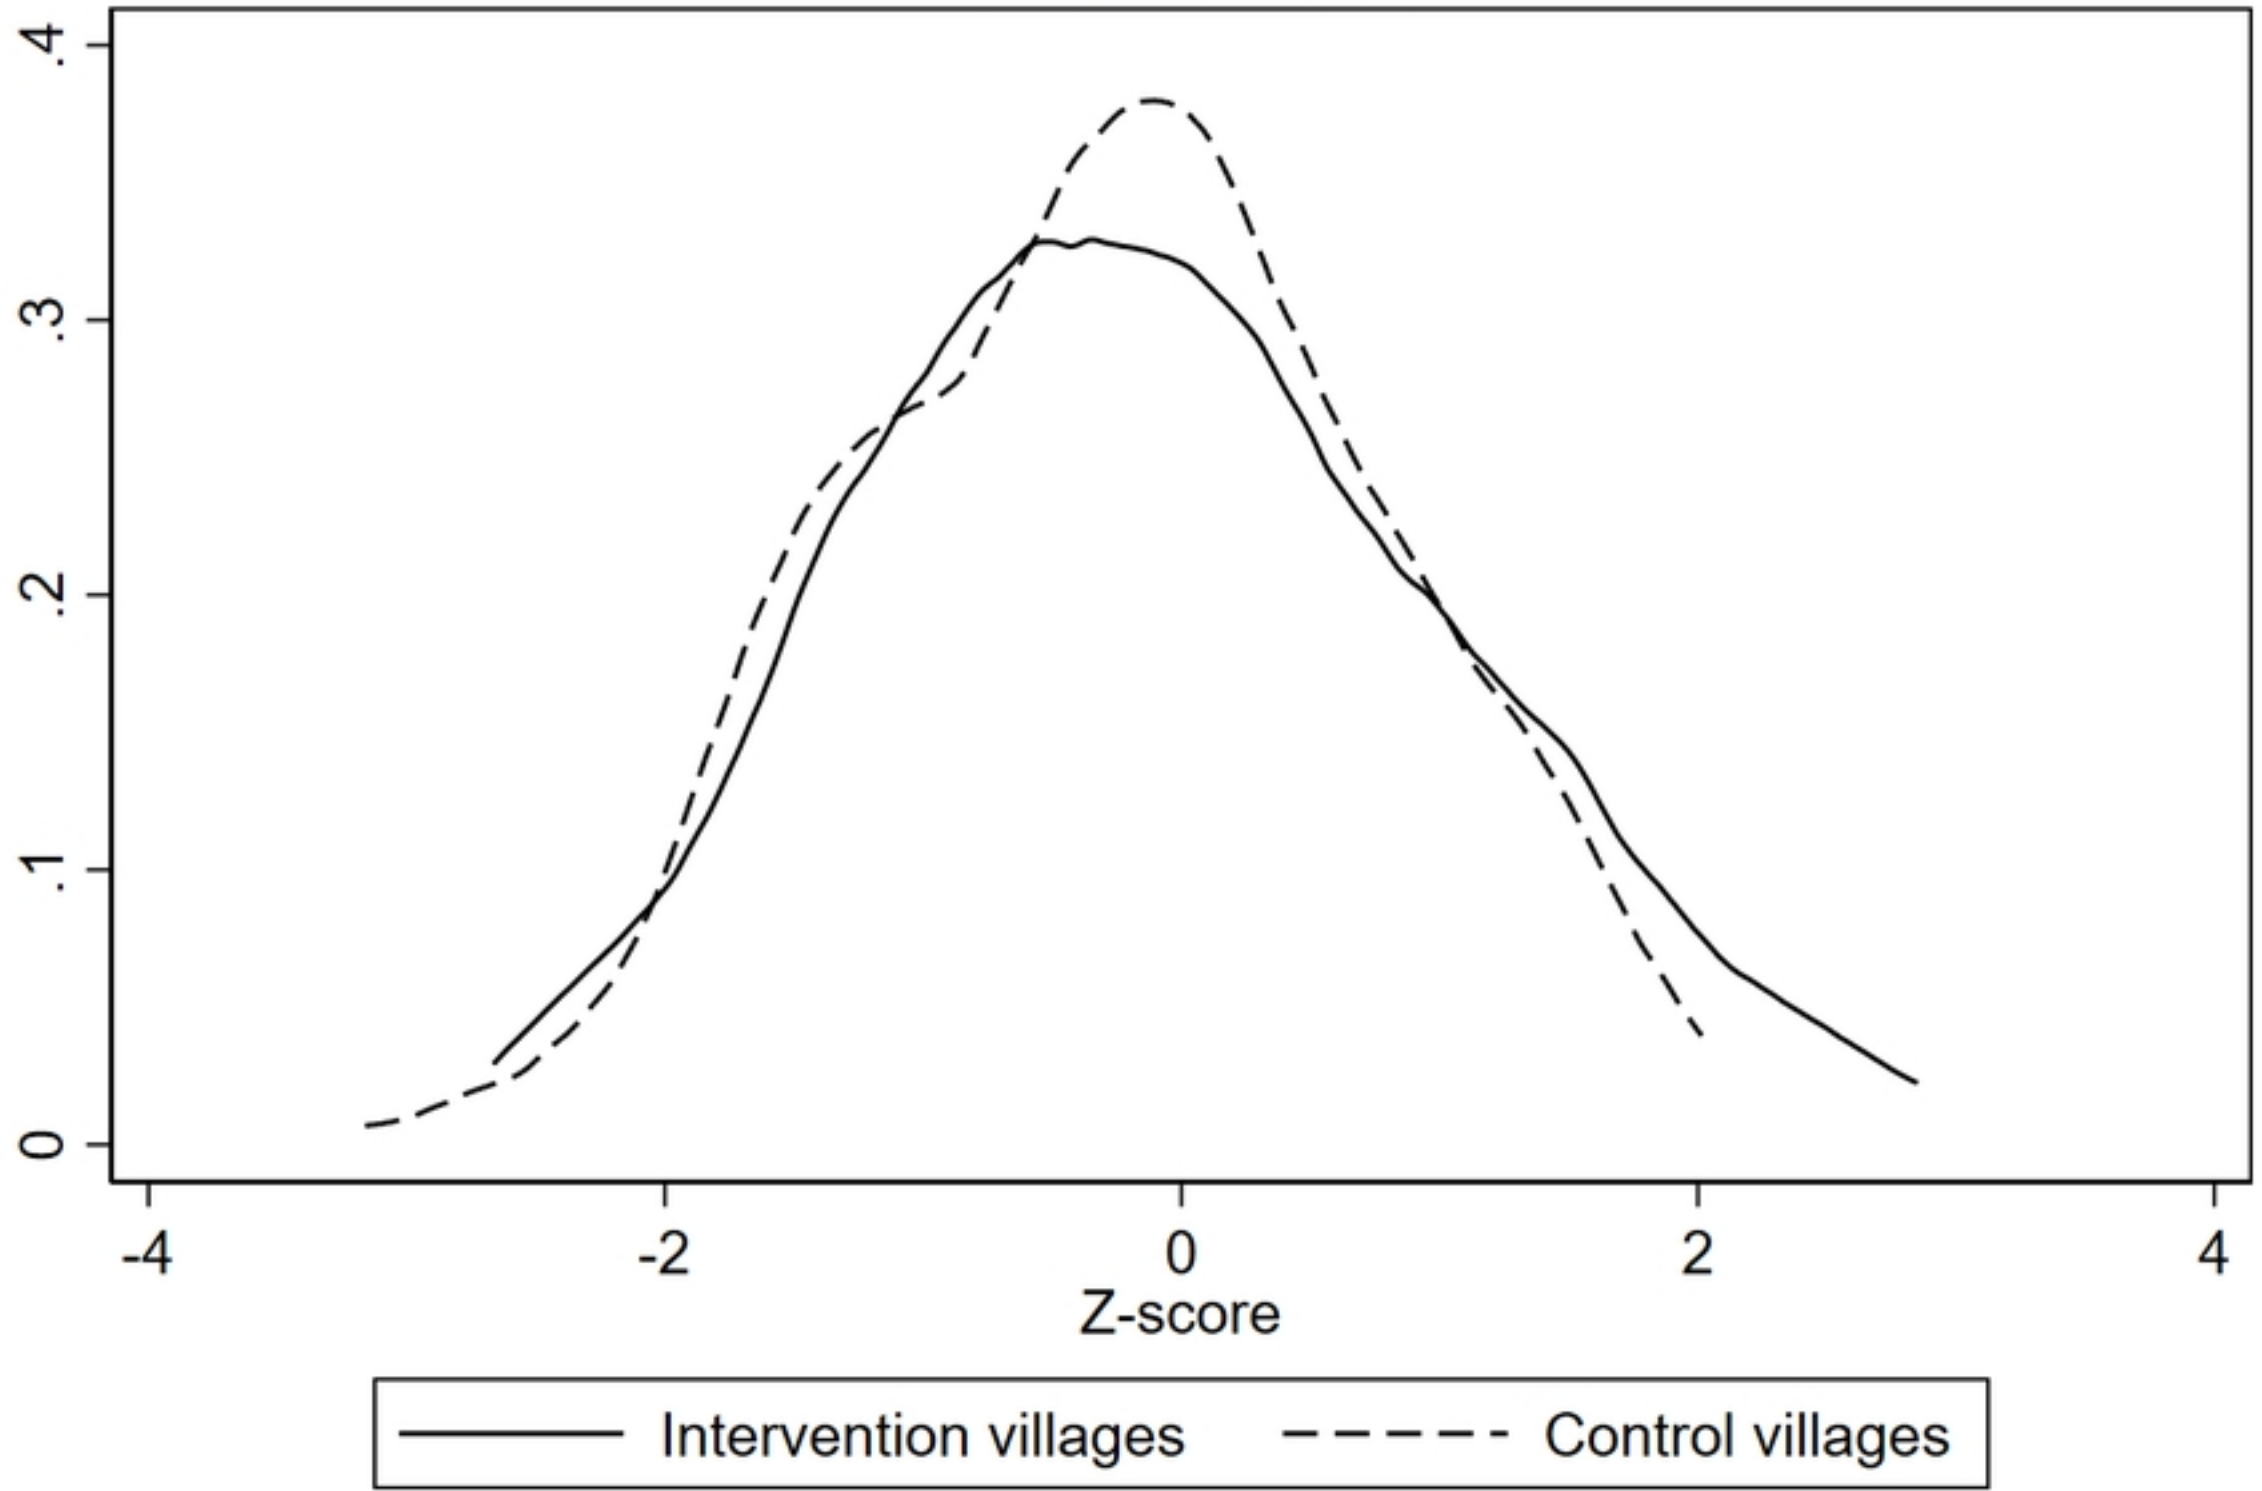

Figure



# 18-23 months

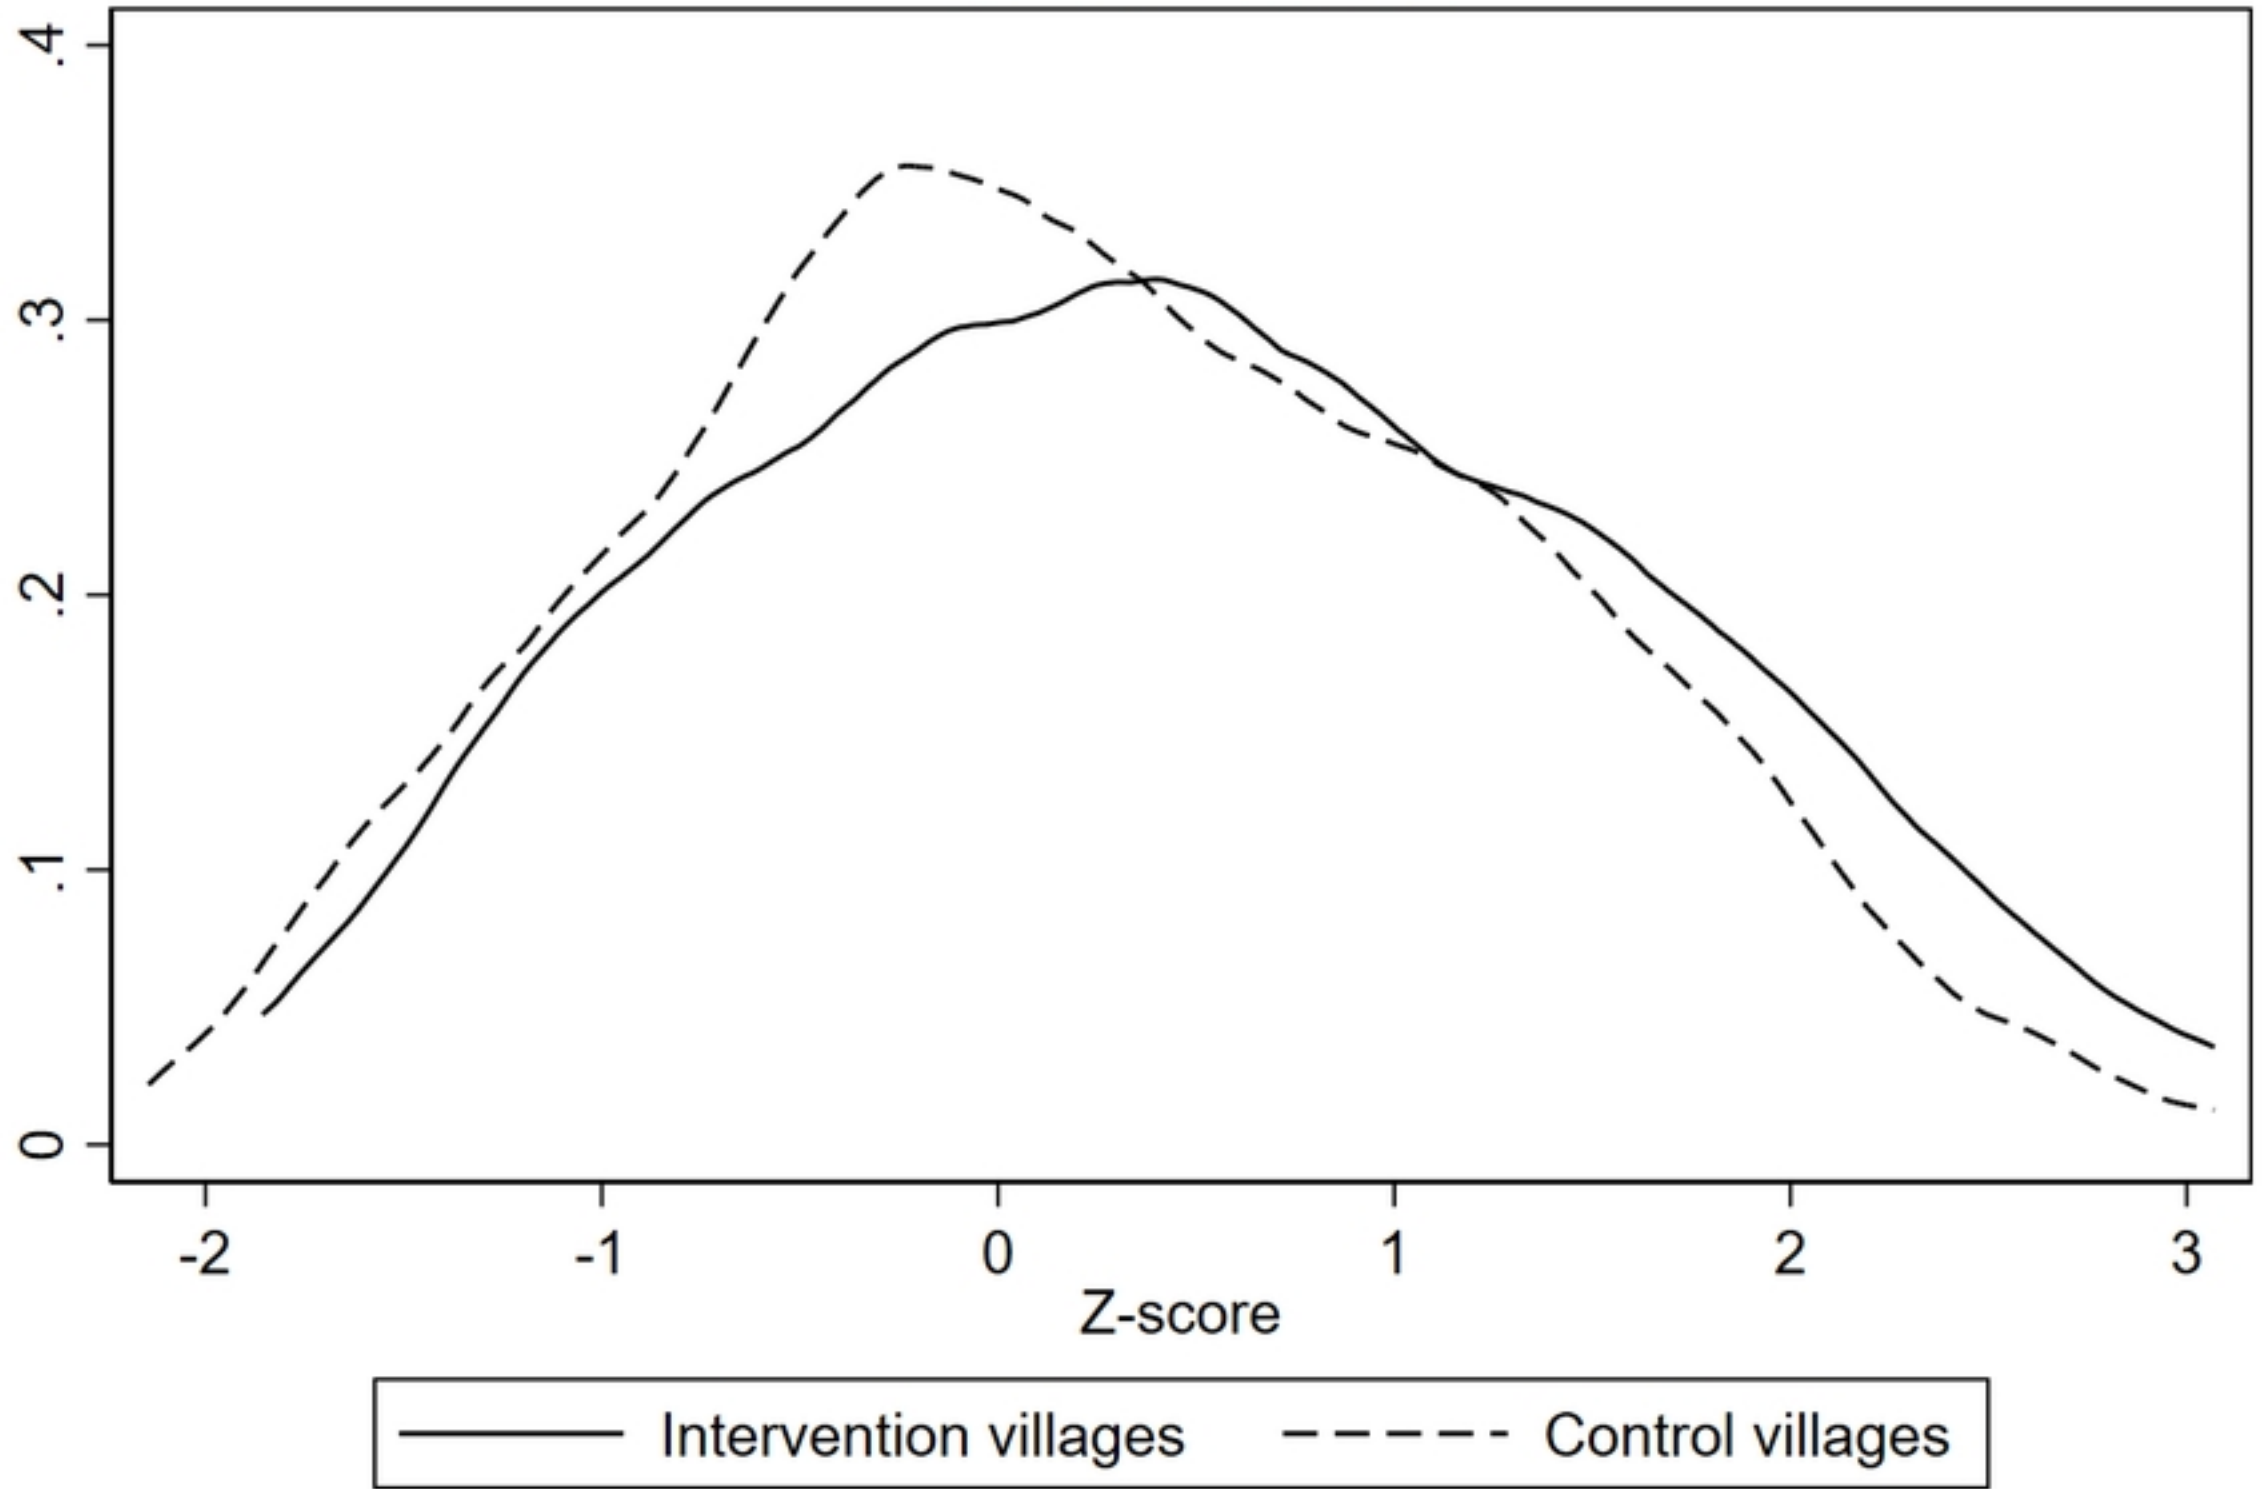

Figure

# 24-29 months

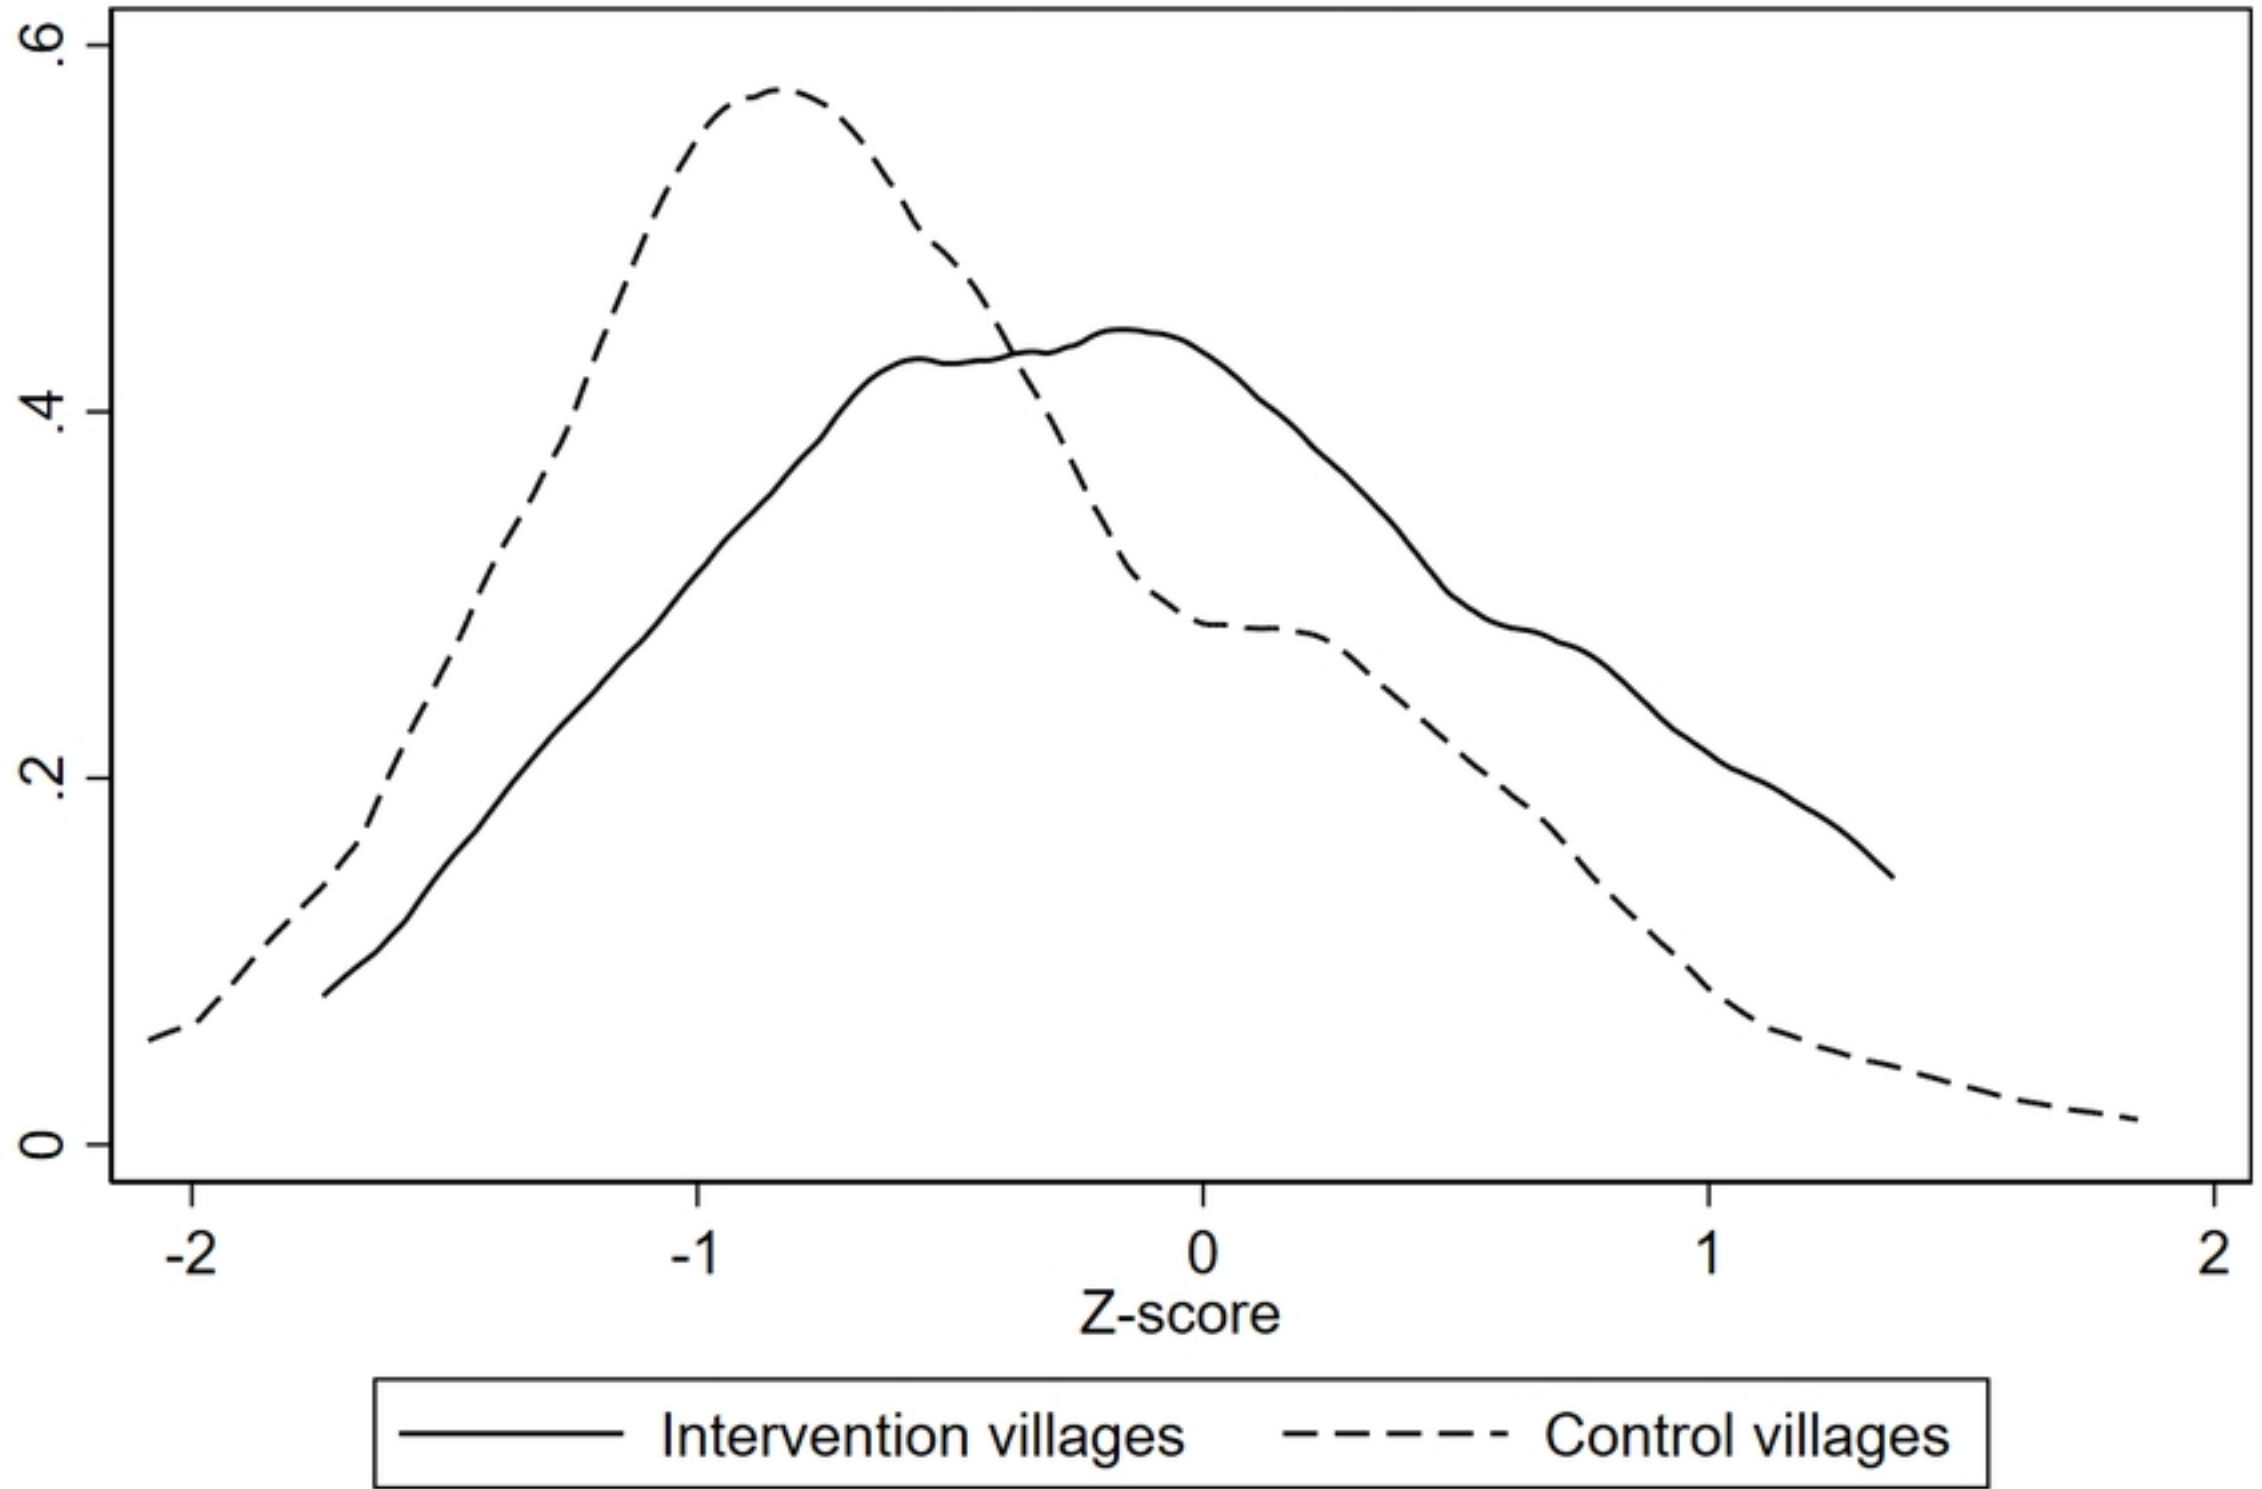

Figure

# 30-35 months

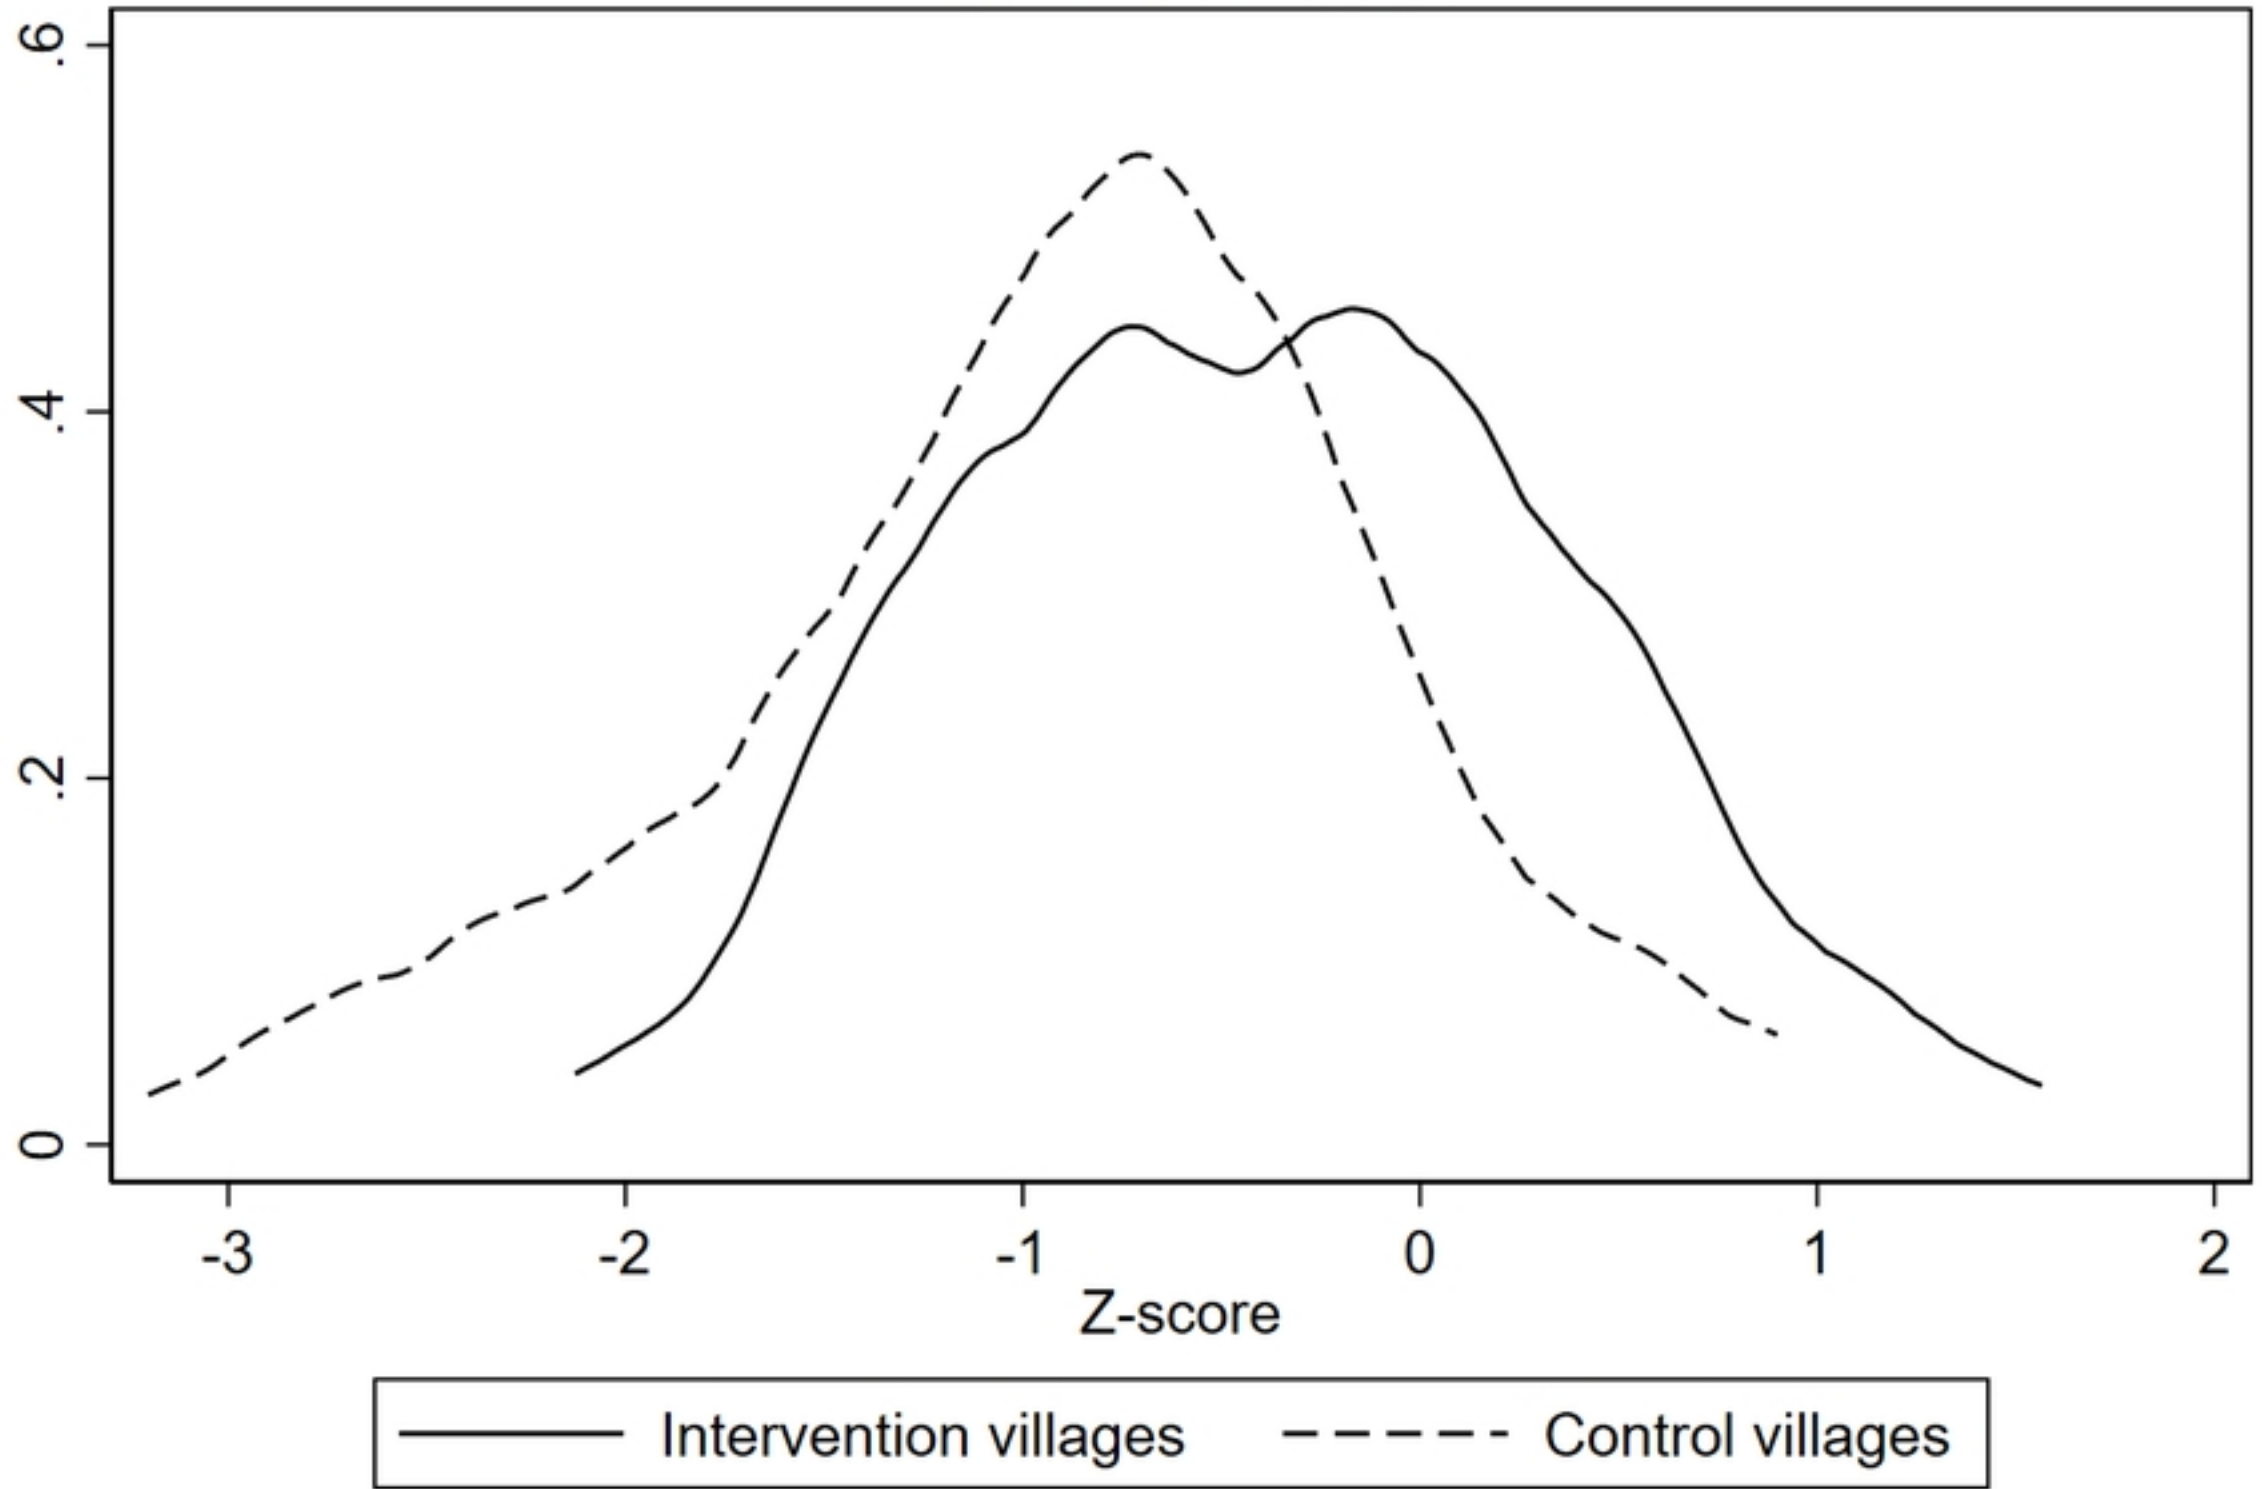

Figure

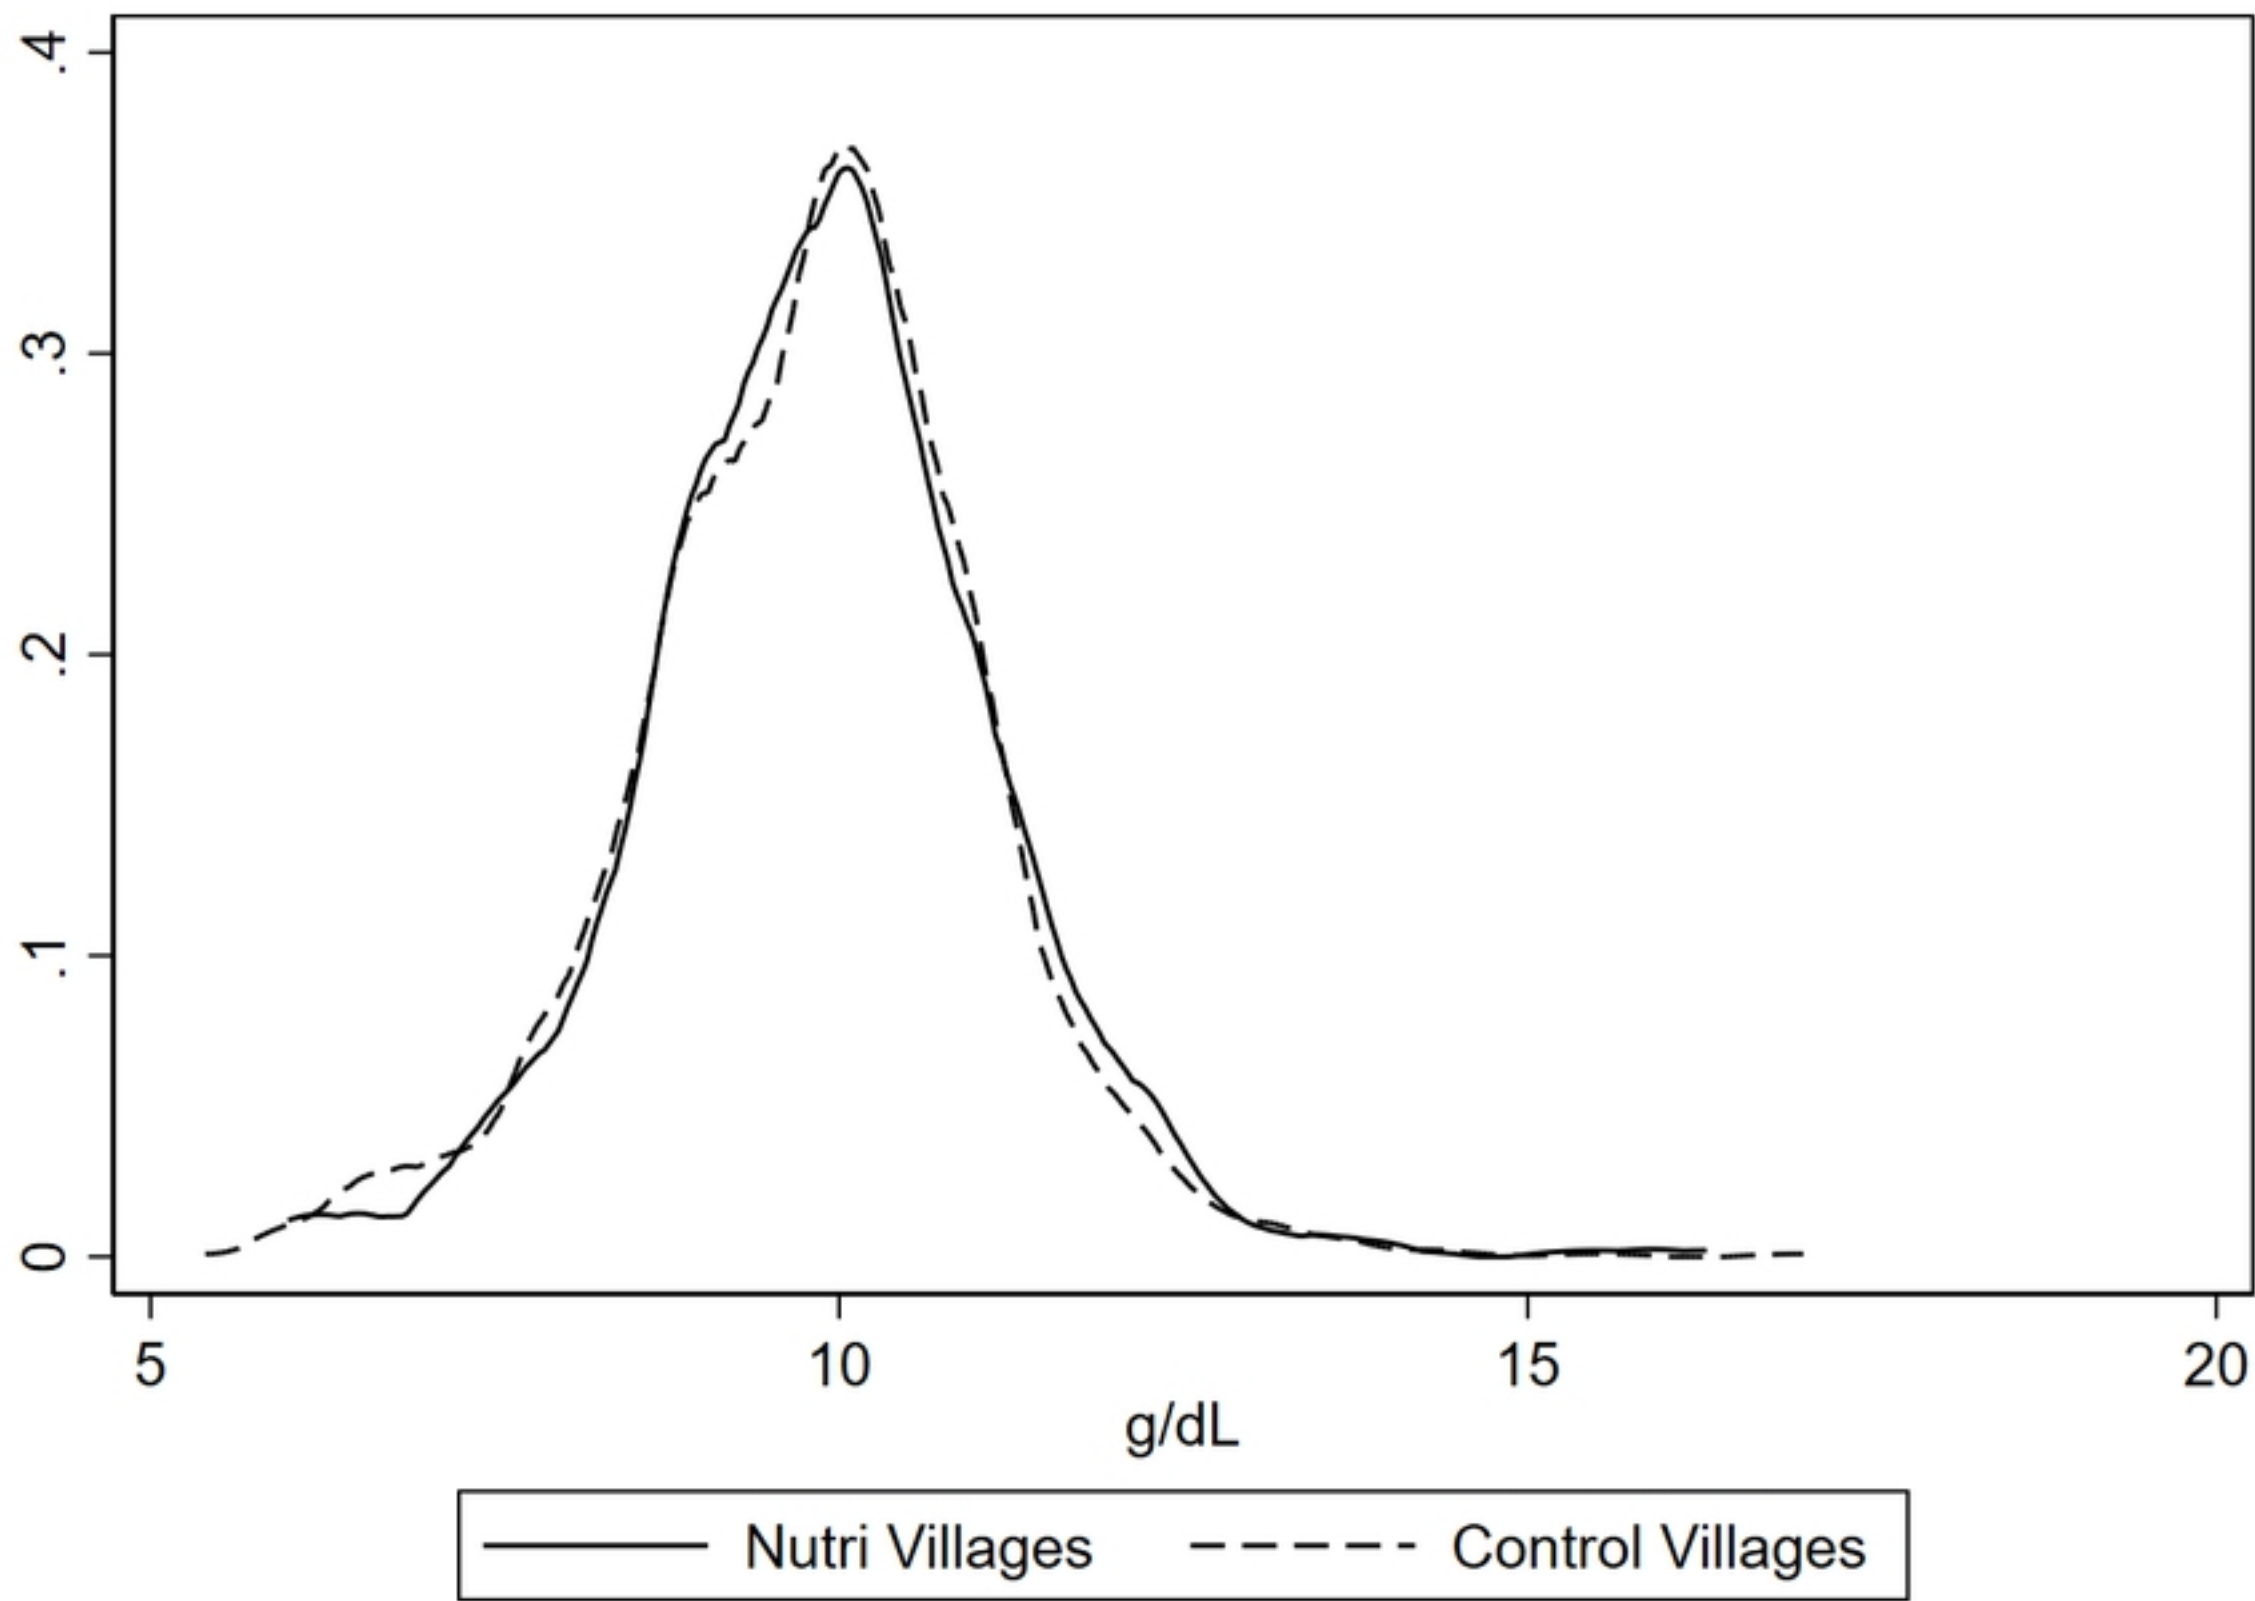

Figure

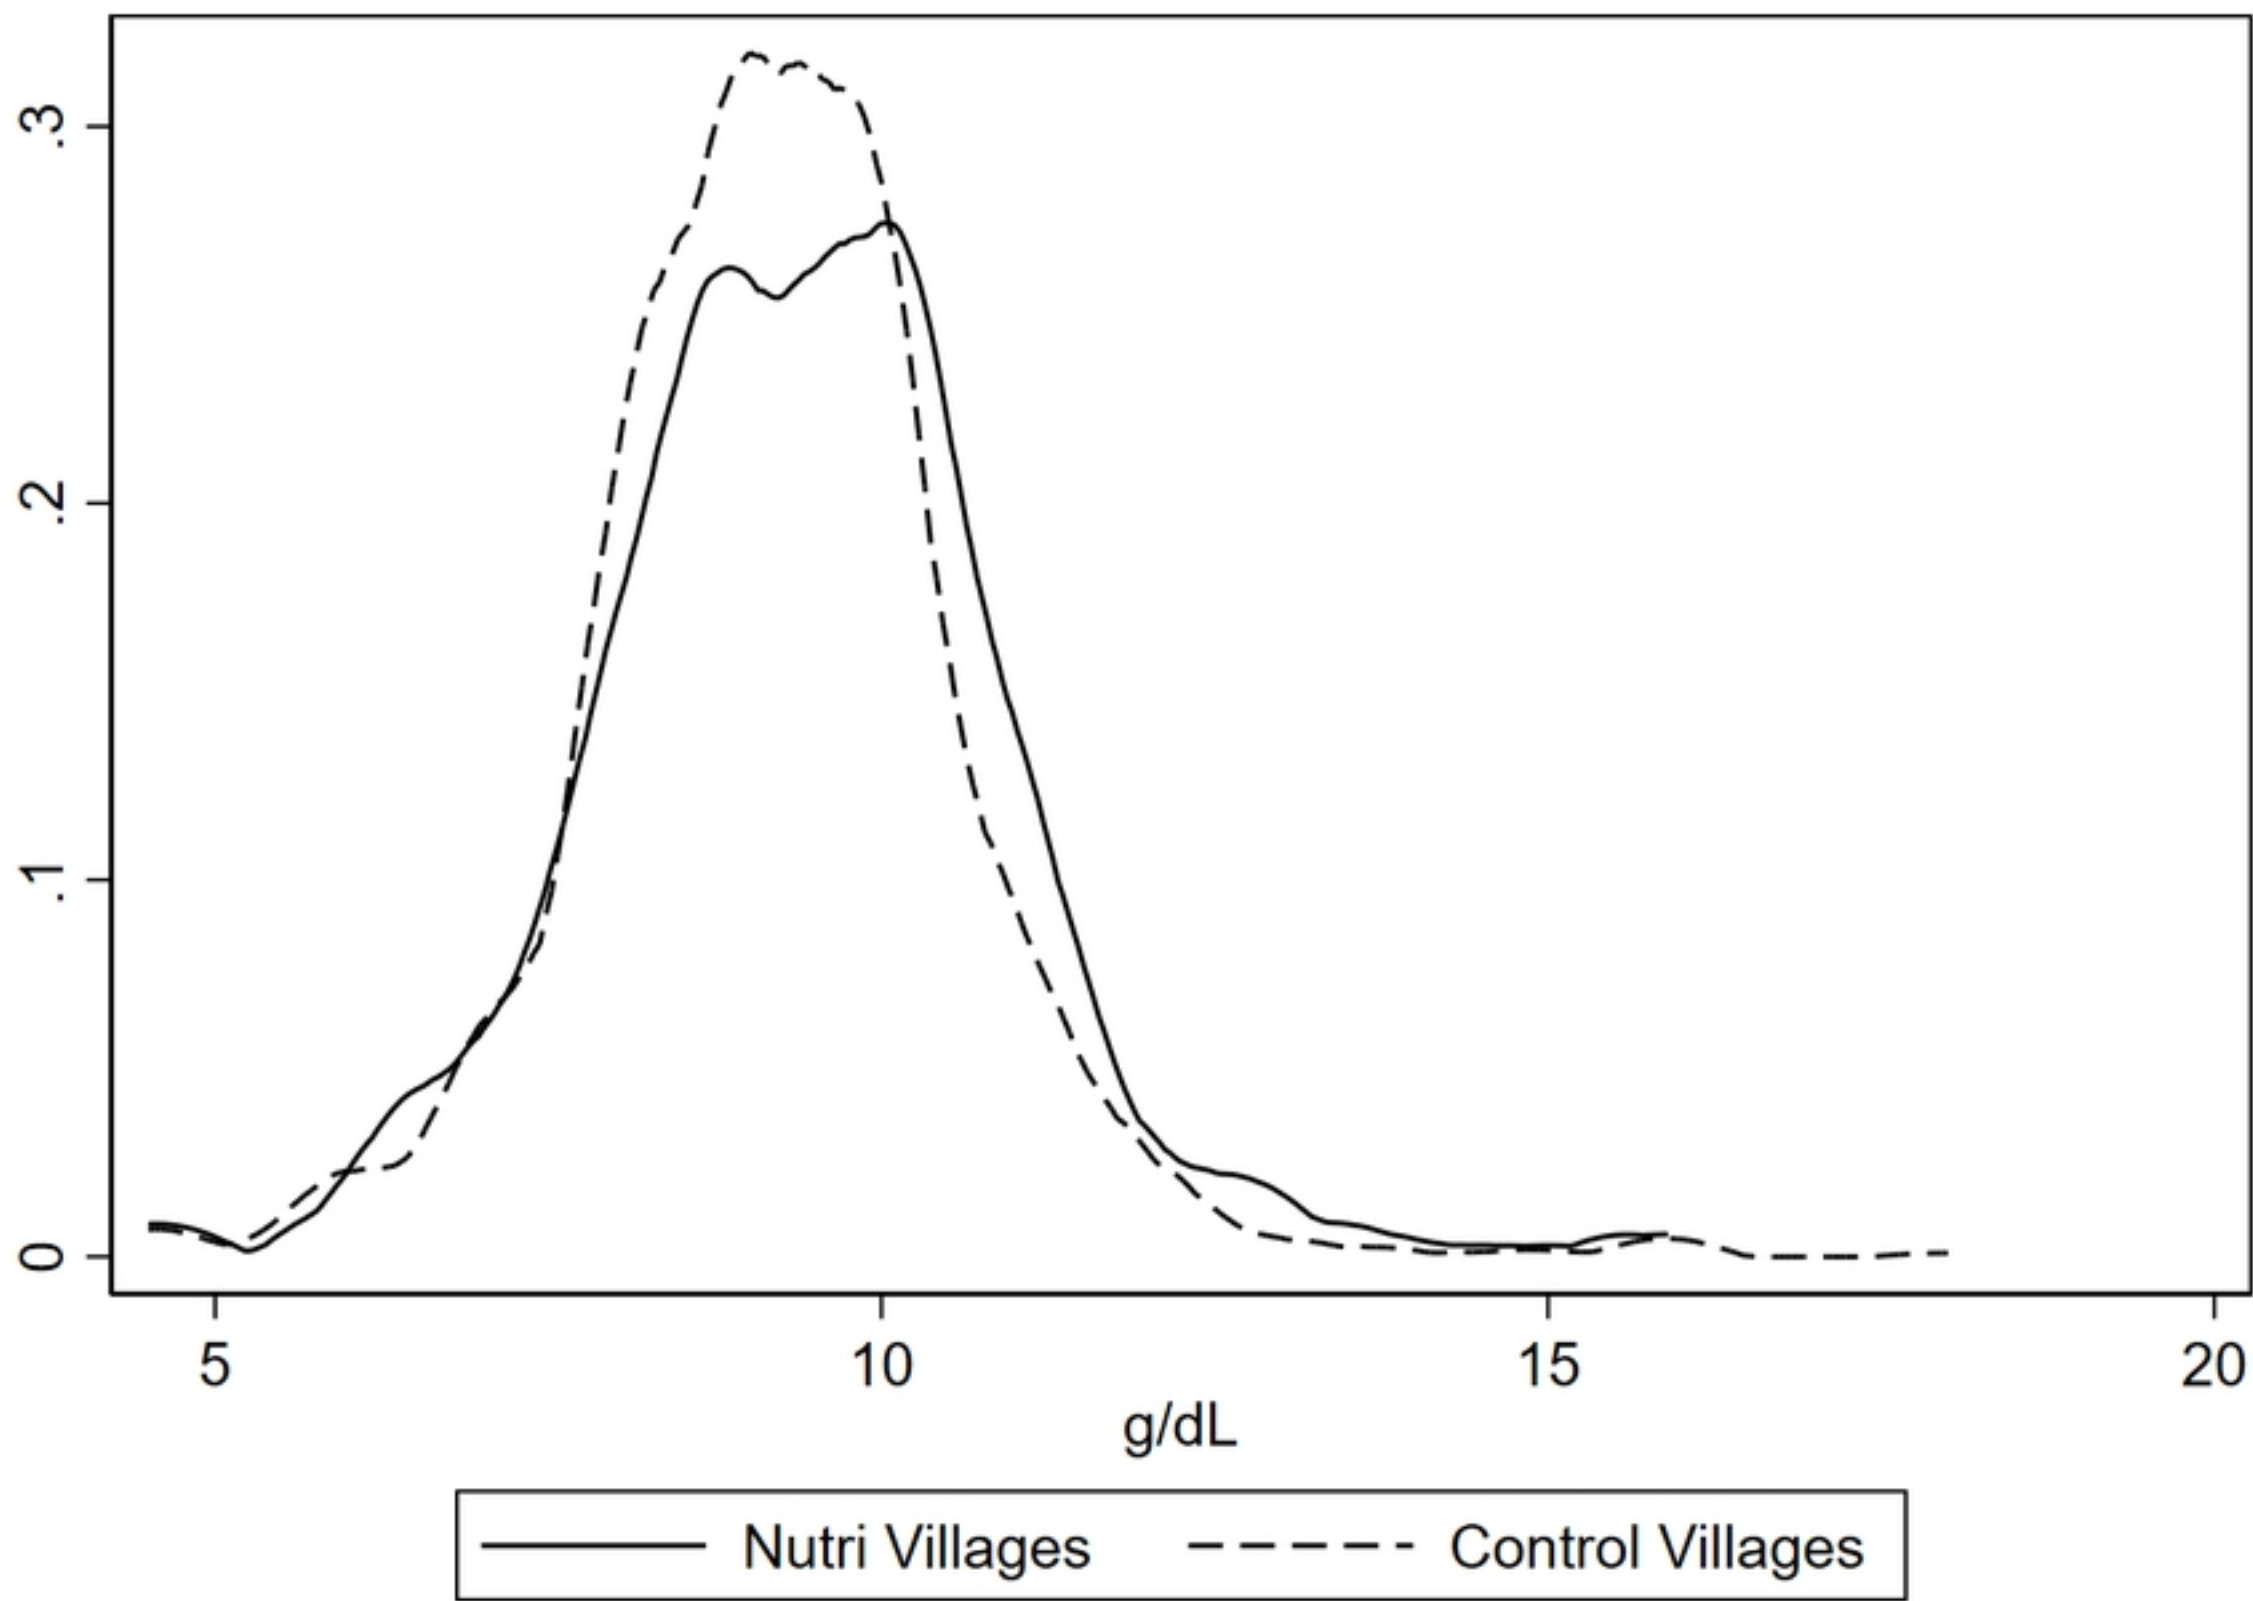

Figure

medRxiv preprint doi: <https://doi.org/10.1101/2023.05.16.23290036>; this version posted May 22, 2023. The copyright holder for this preprint (which was not certified by peer review) is the author/funder, who has granted medRxiv a license to display the preprint in perpetuity. It is made available under a [CC-BY 4.0 International license](https://creativecommons.org/licenses/by/4.0/).

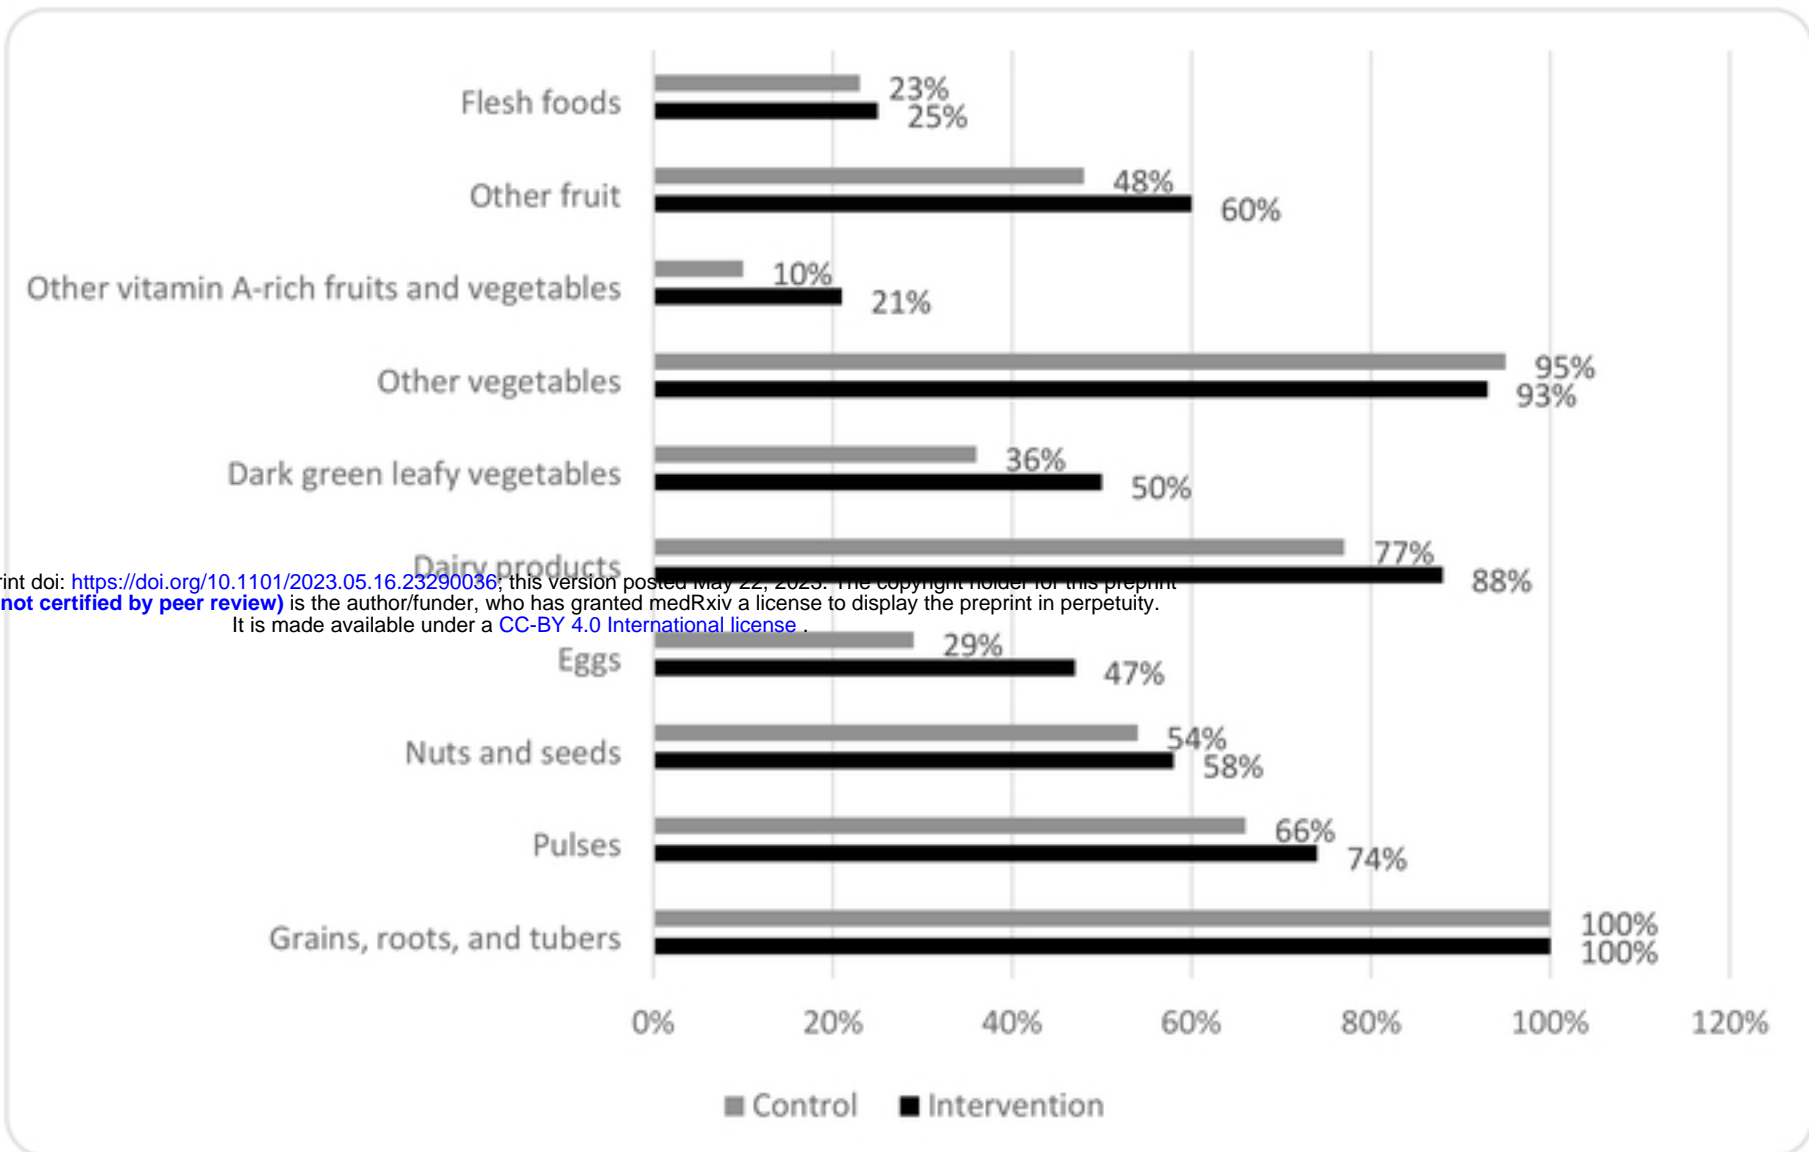

medRxiv preprint doi: <https://doi.org/10.1101/2023.05.16.23290036>; this version posted May 22, 2023. The copyright holder for this preprint (which was not certified by peer review) is the author/funder, who has granted medRxiv a license to display the preprint in perpetuity. It is made available under a [CC-BY 4.0 International license](https://creativecommons.org/licenses/by/4.0/).

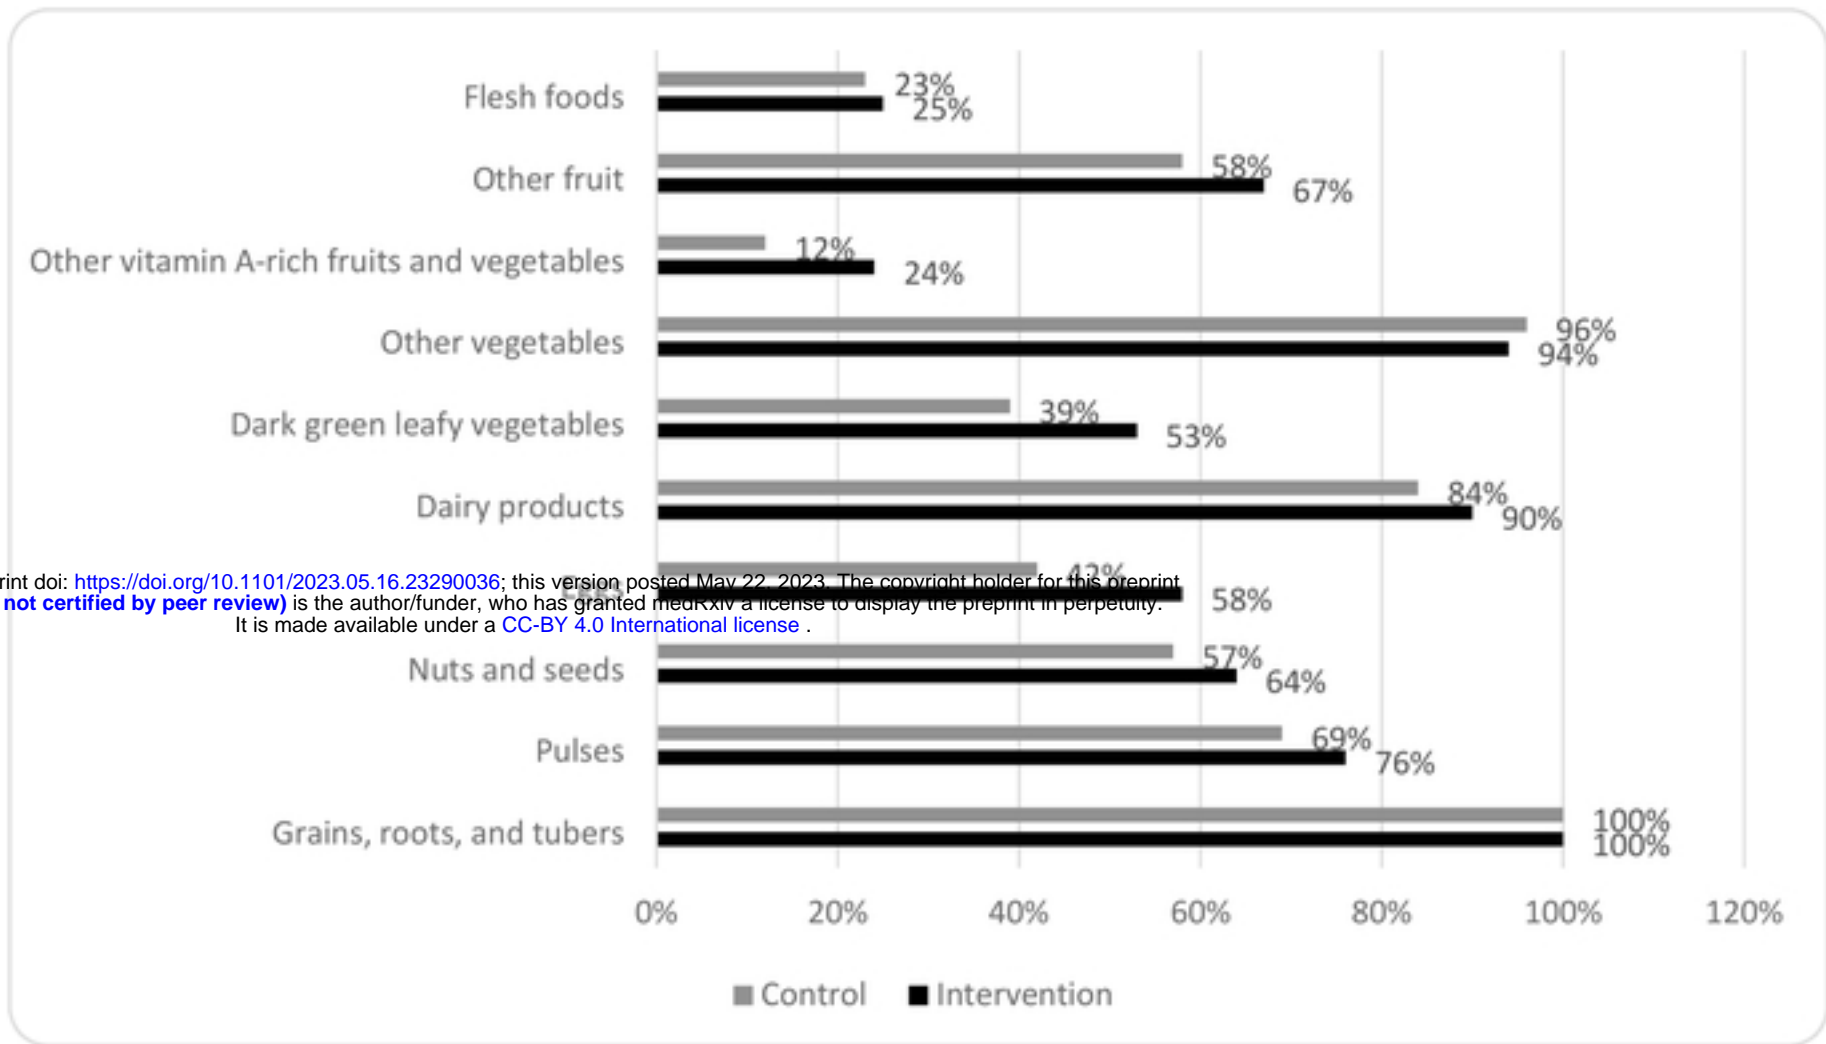

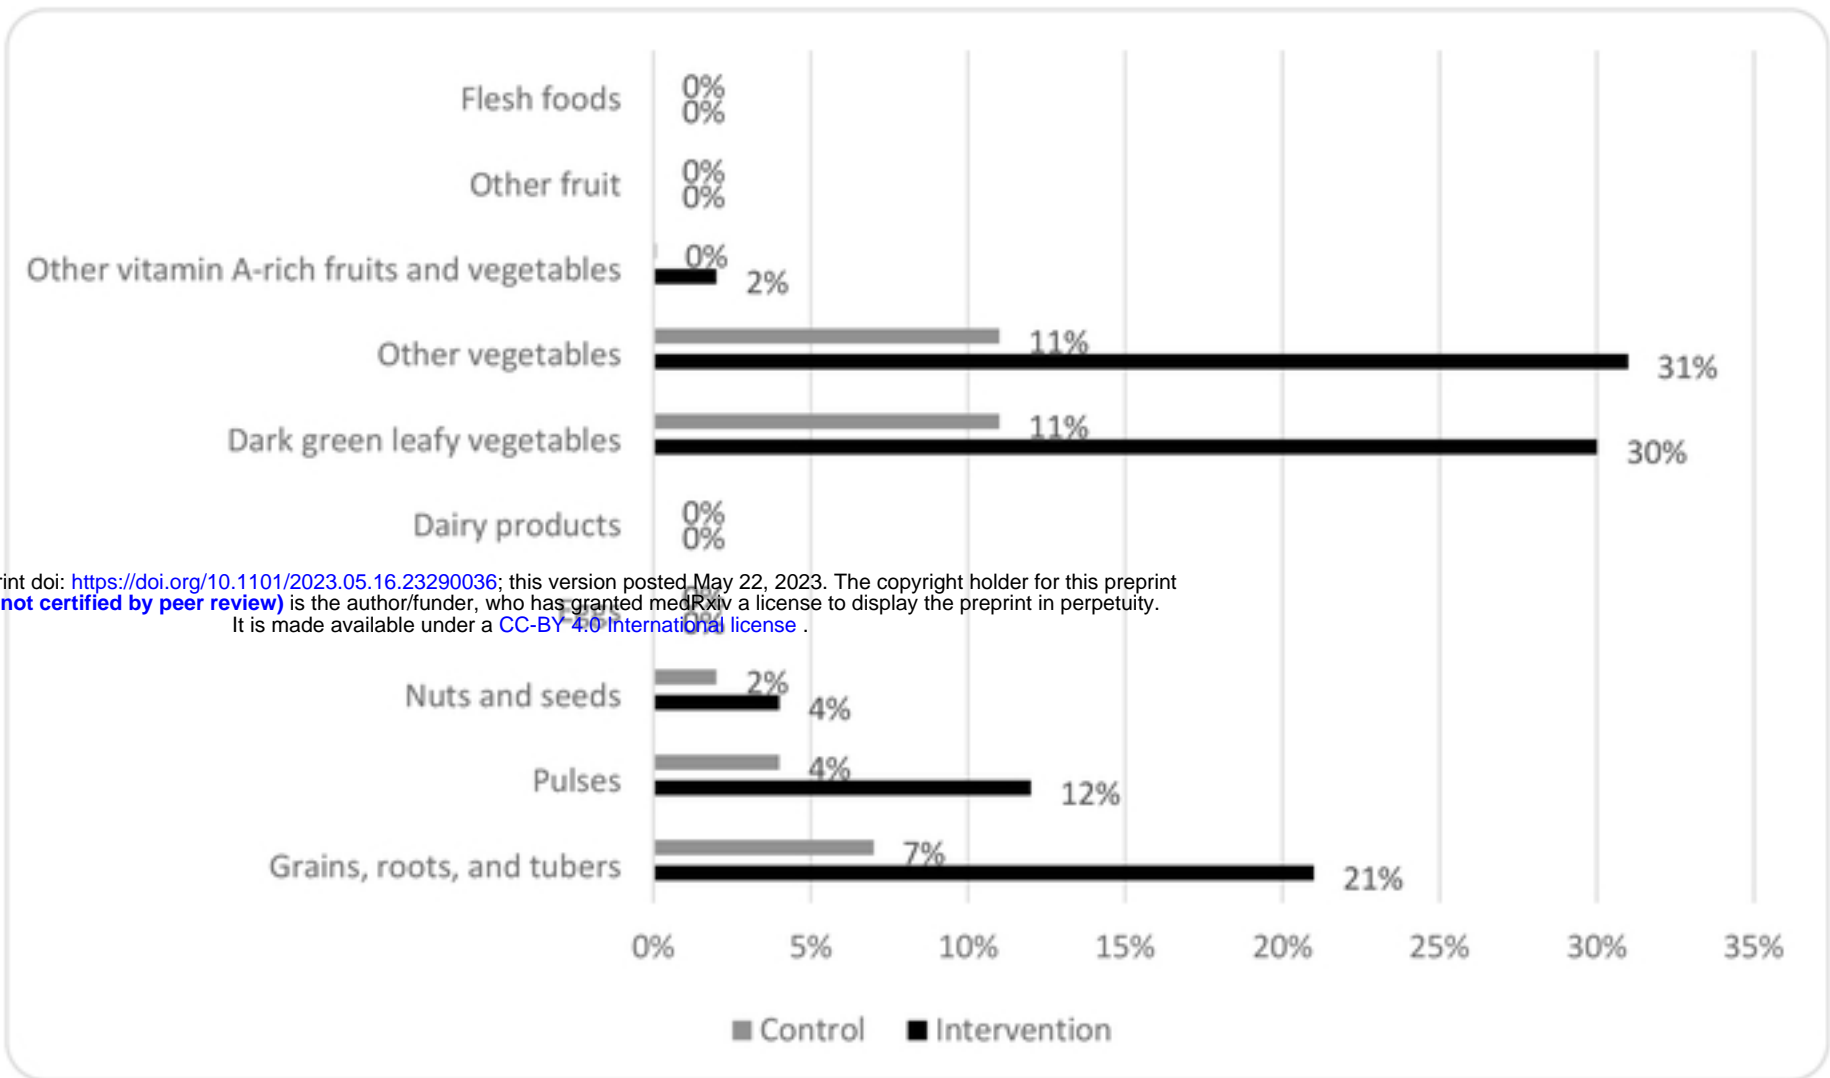

medRxiv preprint doi: <https://doi.org/10.1101/2023.05.16.23290036>; this version posted May 22, 2023. The copyright holder for this preprint (which was not certified by peer review) is the author/funder, who has granted medRxiv a license to display the preprint in perpetuity. It is made available under a [CC-BY 4.0 International license](https://creativecommons.org/licenses/by/4.0/).



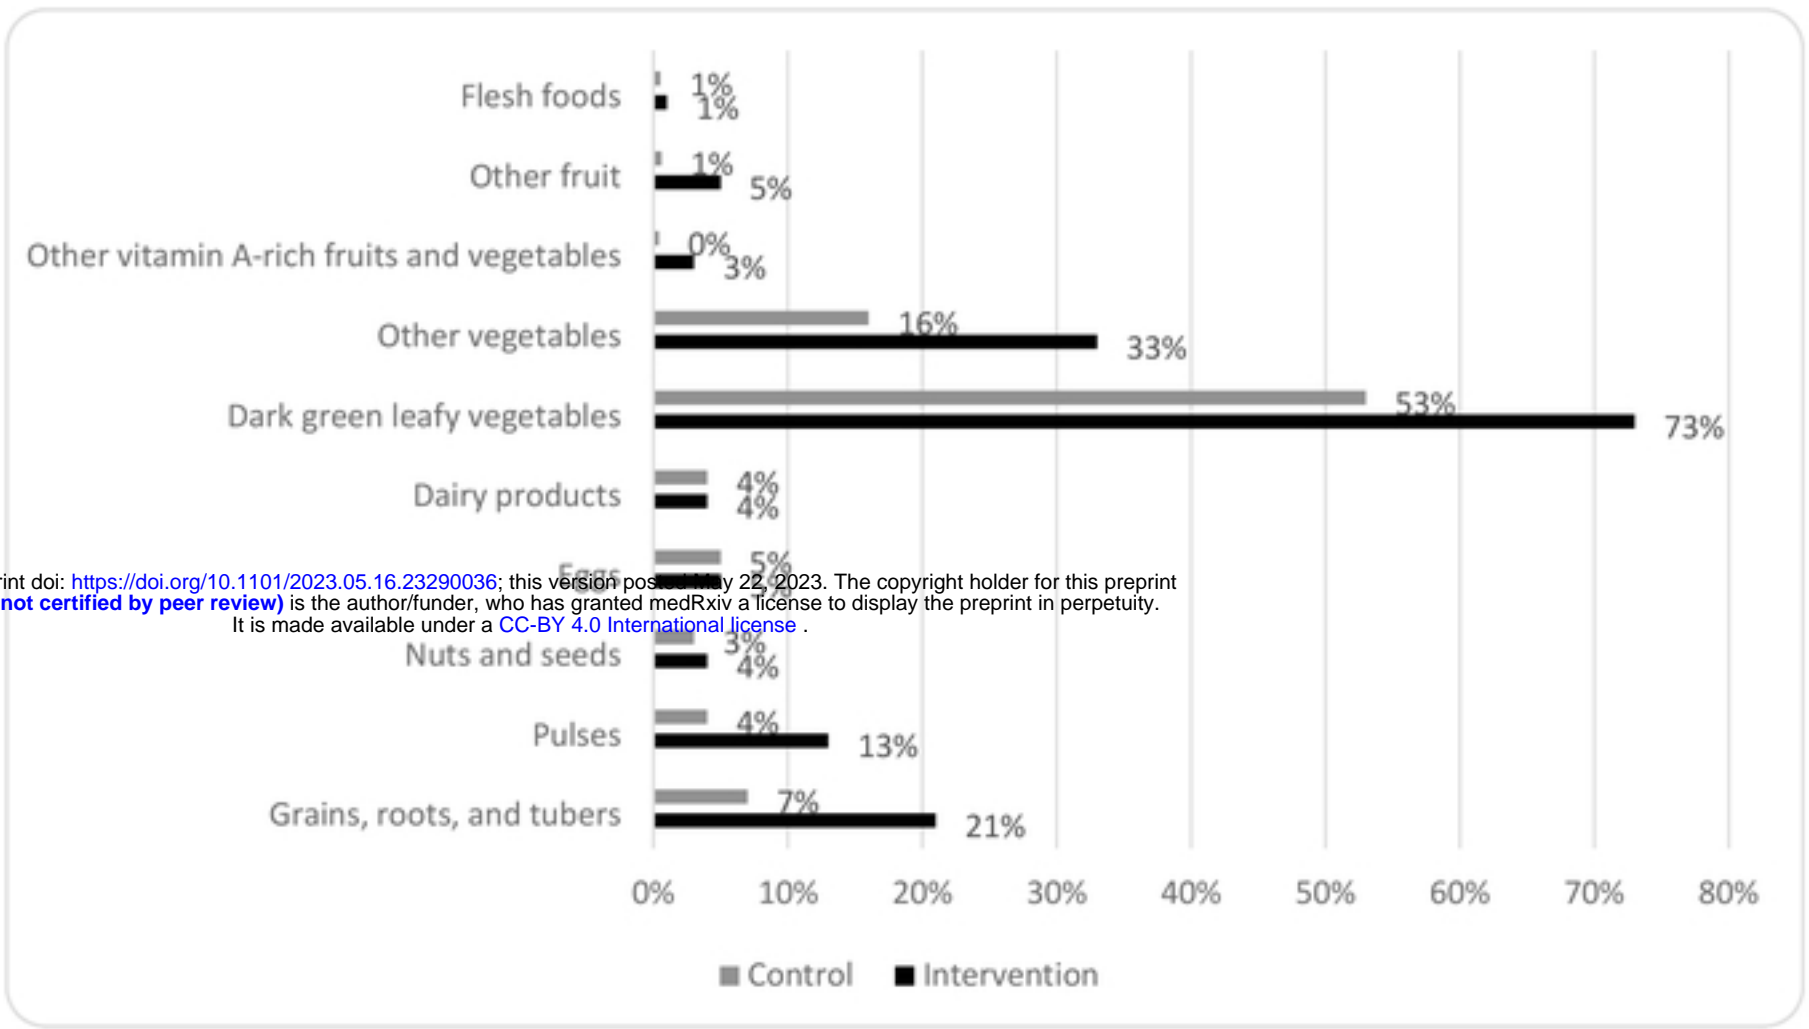

medRxiv preprint doi: <https://doi.org/10.1101/2023.05.16.23290036>; this version posted May 22, 2023. The copyright holder for this preprint (which was not certified by peer review) is the author/funder, who has granted medRxiv a license to display the preprint in perpetuity. It is made available under a [CC-BY 4.0 International license](https://creativecommons.org/licenses/by/4.0/).

medRxiv preprint doi: <https://doi.org/10.1101/2023.05.16.23290036>; this version posted May 22, 2023. The copyright holder for this preprint (which was not certified by peer review) is the author/funder, who has granted medRxiv a license to display the preprint in perpetuity. It is made available under a [CC-BY 4.0 International license](https://creativecommons.org/licenses/by/4.0/).

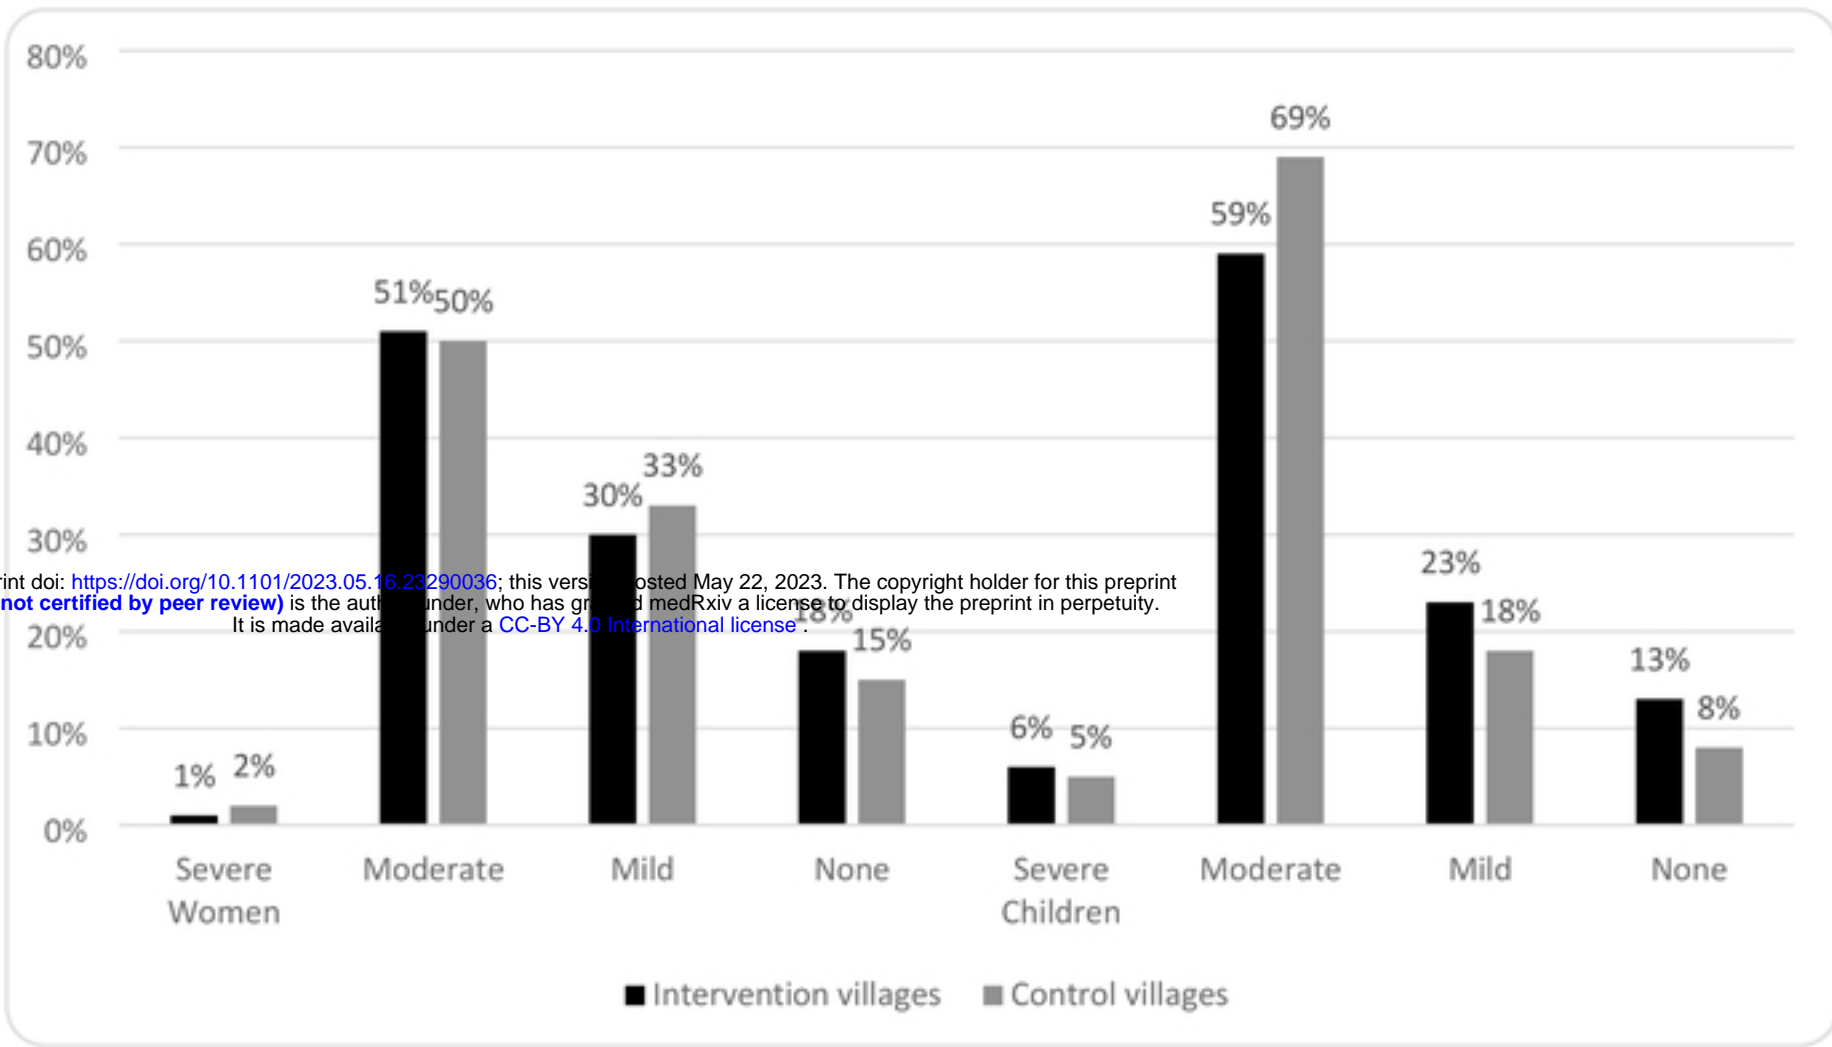

medRxiv preprint doi: <https://doi.org/10.1101/2023.05.16.23290036>; this version posted May 22, 2023. The copyright holder for this preprint (which was not certified by peer review) is the author/funder, who has granted medRxiv a license to display the preprint in perpetuity. It is made available under a [CC-BY 4.0 International license](https://creativecommons.org/licenses/by/4.0/).

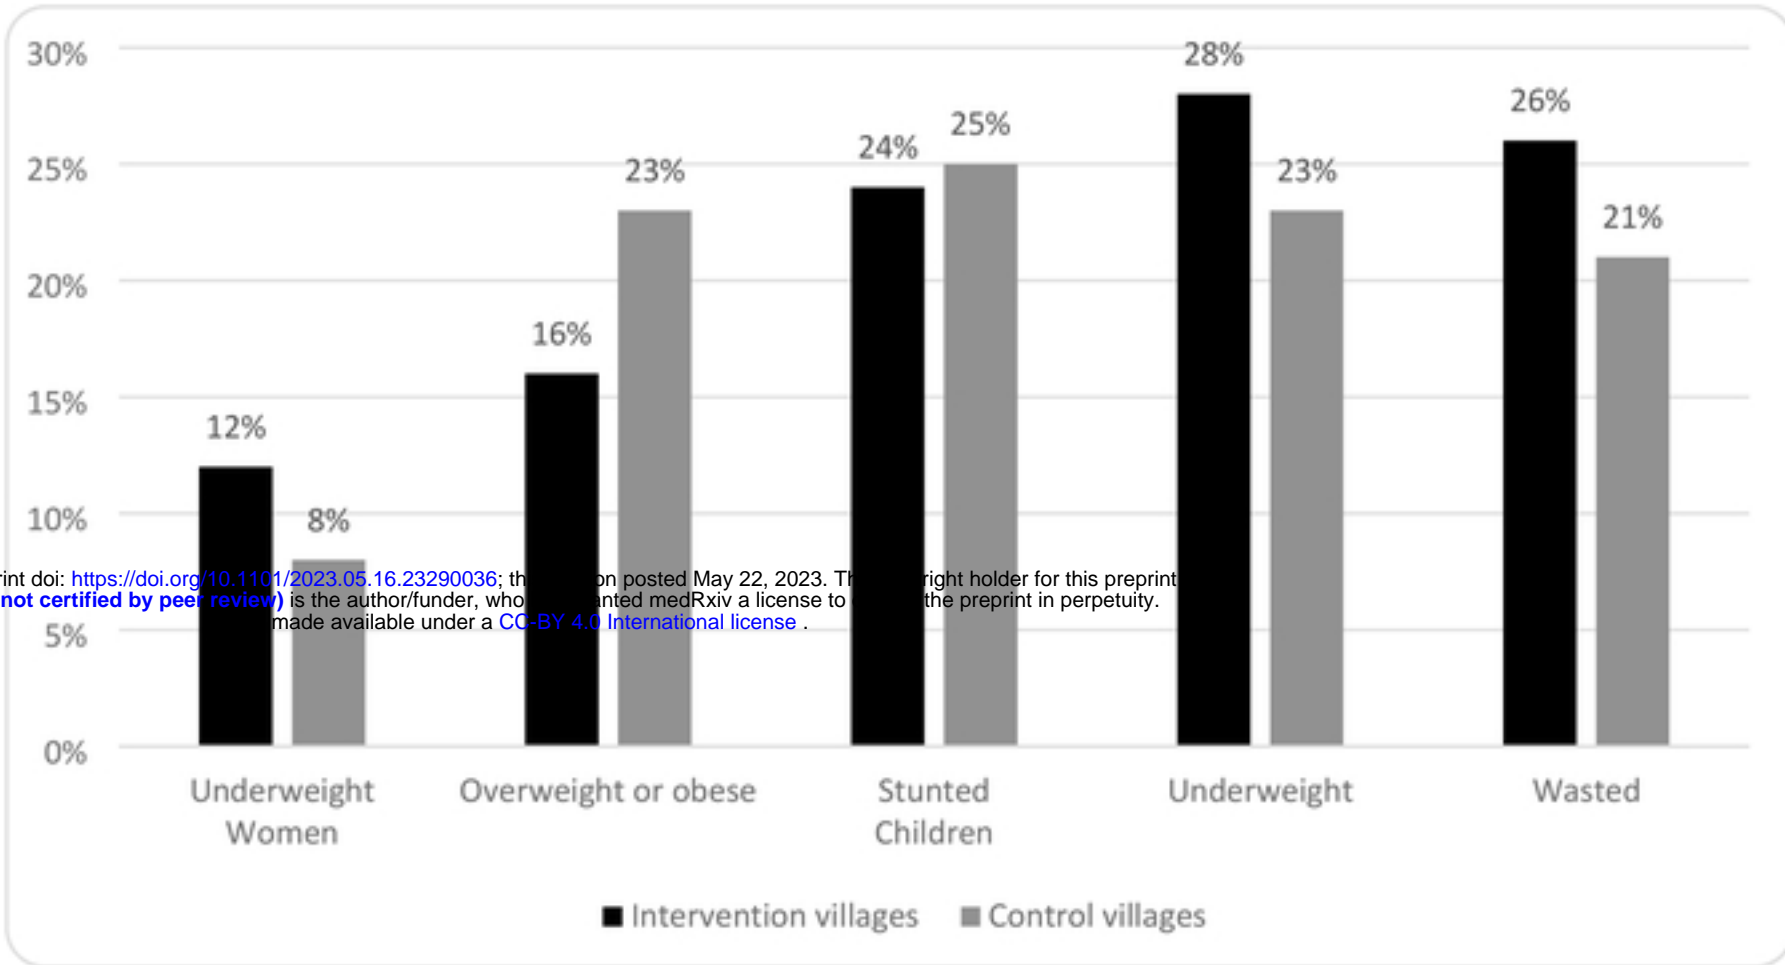

medRxiv preprint doi: <https://doi.org/10.1101/2023.05.16.23290036>; this version posted May 22, 2023. The copyright holder for this preprint (which was not certified by peer review) is the author/funder, who has granted medRxiv a license to display the preprint in perpetuity. It is made available under a [CC-BY 4.0 International license](https://creativecommons.org/licenses/by/4.0/).

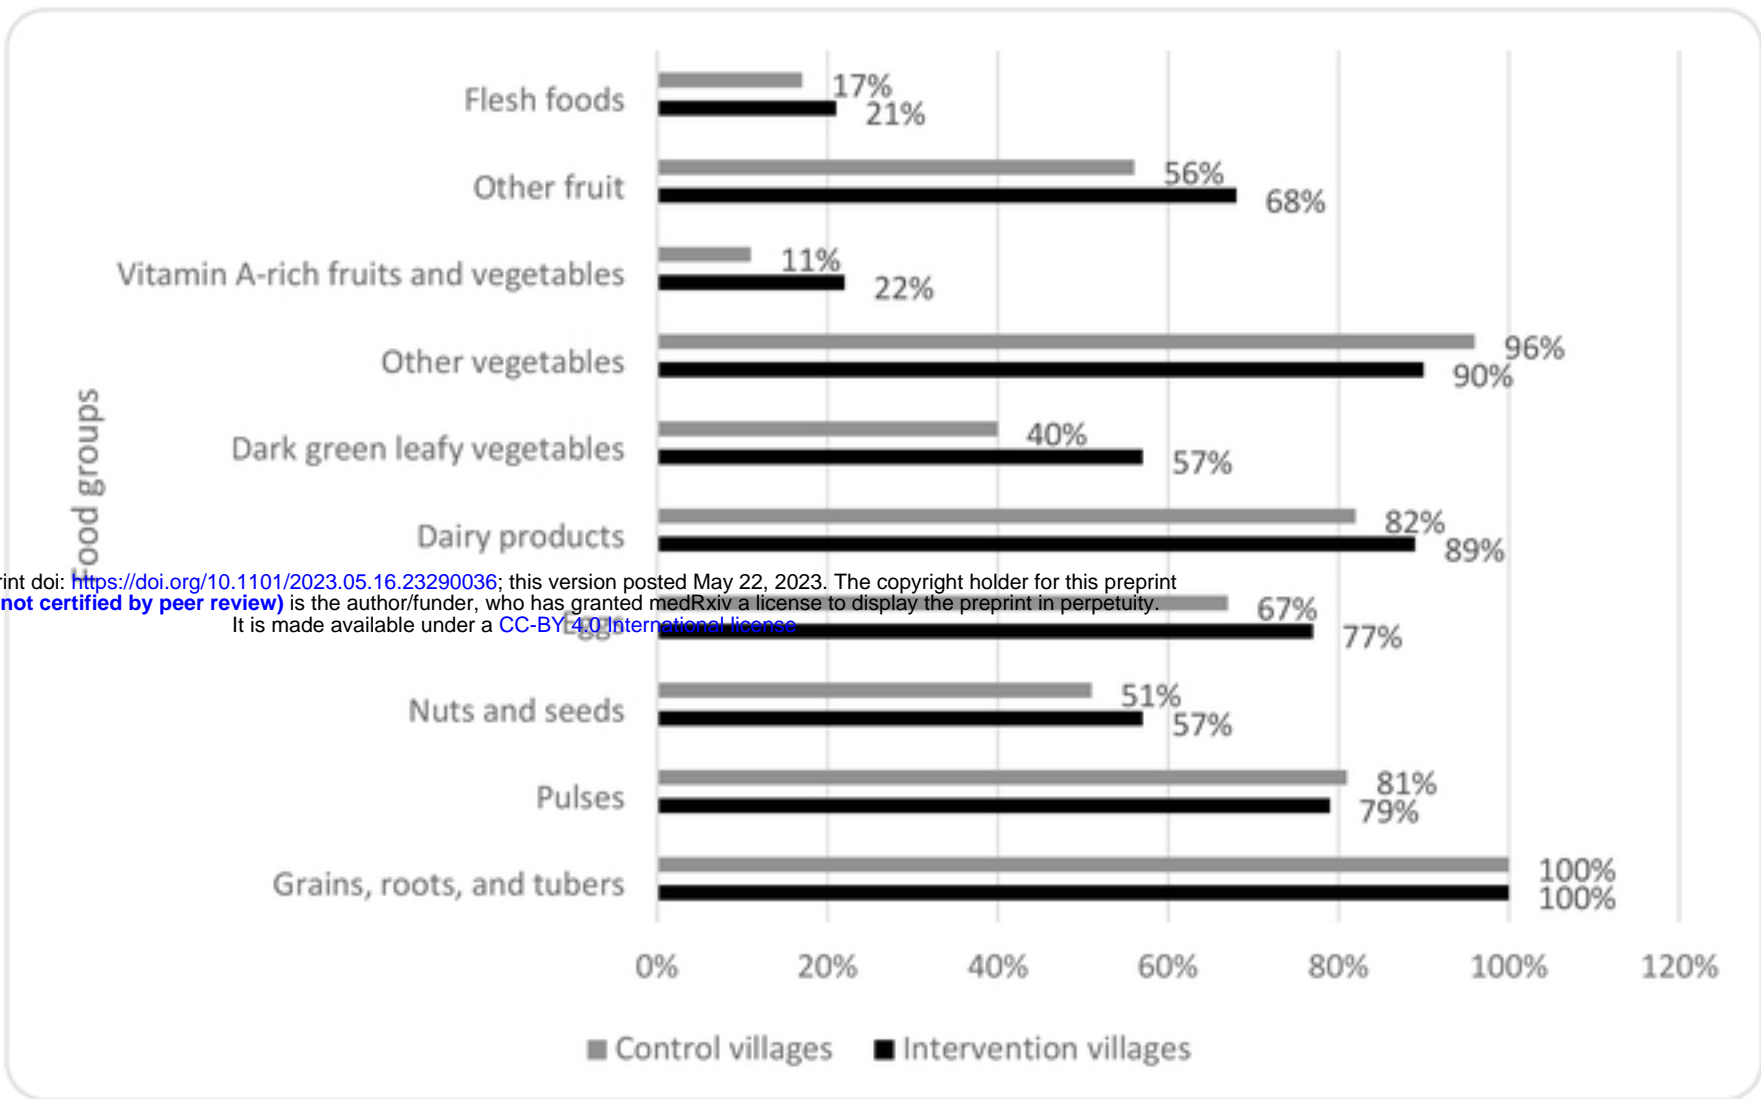

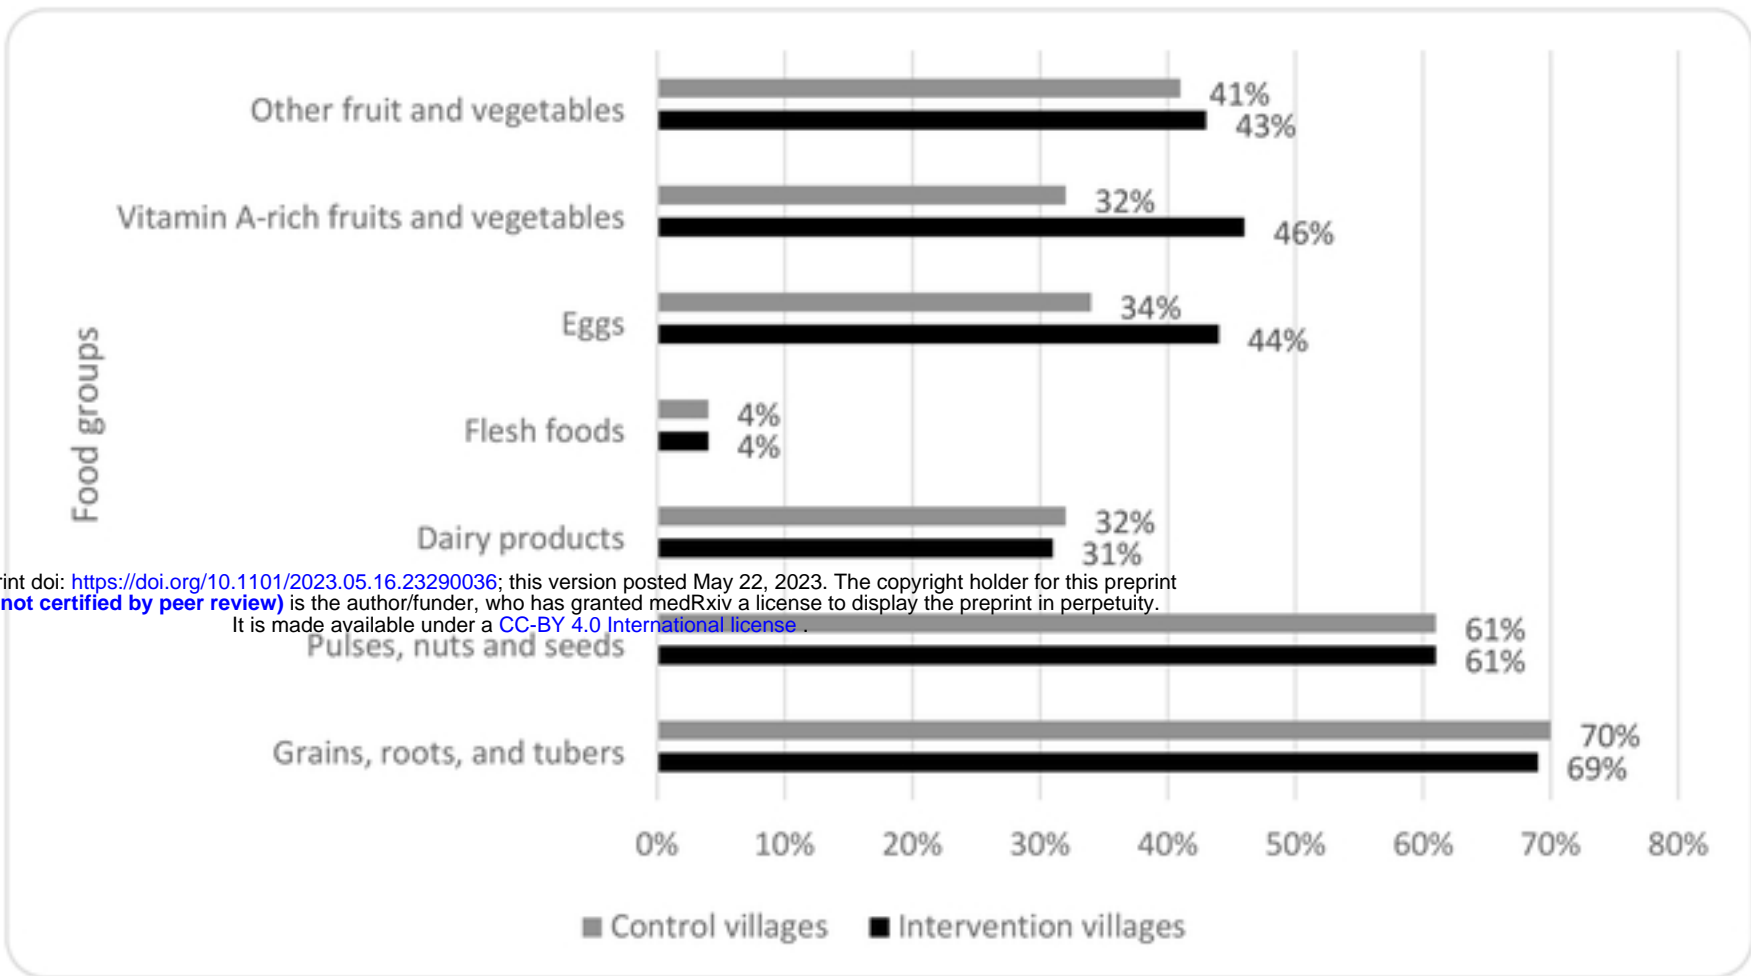

medRxiv preprint doi: <https://doi.org/10.1101/2023.05.16.23290036>; this version posted May 22, 2023. The copyright holder for this preprint (which was not certified by peer review) is the author/funder, who has granted medRxiv a license to display the preprint in perpetuity.

It is made available under a [CC-BY 4.0 International license](https://creativecommons.org/licenses/by/4.0/).
